# Supplementary material
Source: PubMed Central journal article supplement (PMC7206928)
Supplement: NIHMS1581860-supplement-Supplemental.pdf [file NIHMS1581860-supplement-Supplemental.pdf]

Sup. Figure 1

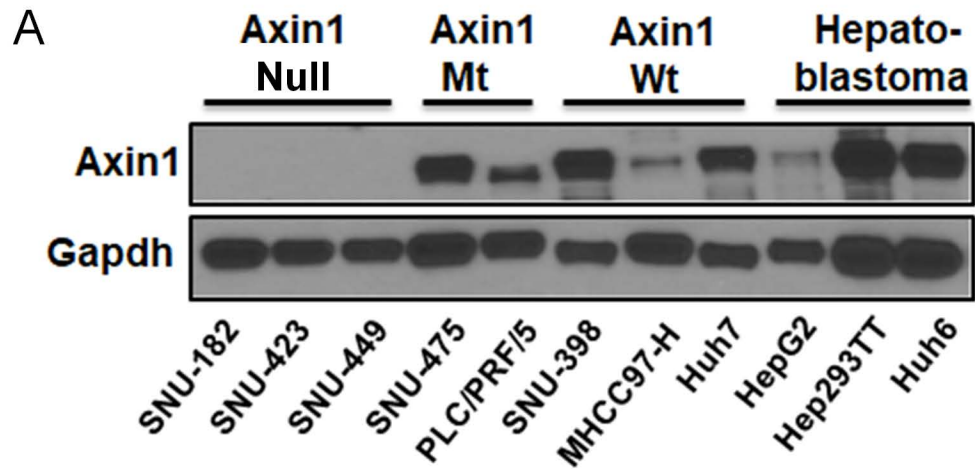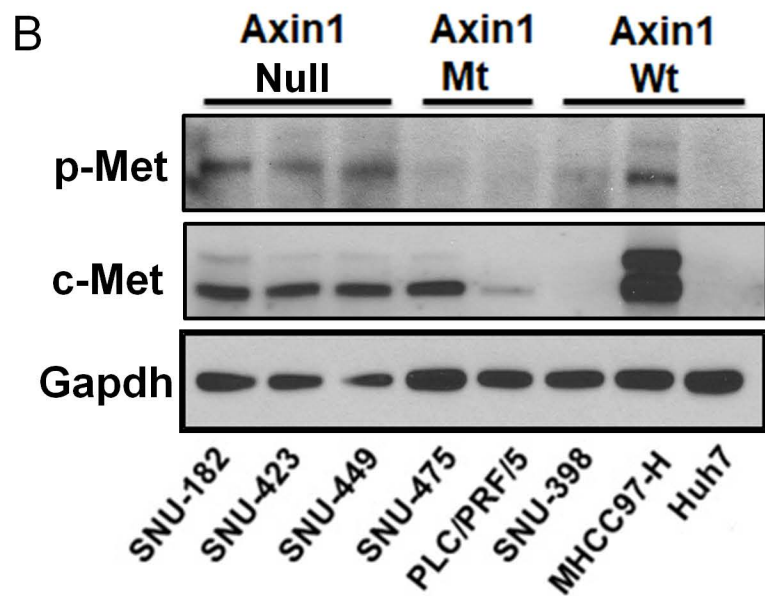

# Sup. Figure 2

A

|        | NGenes | Direction | PValue               | PValue.Mixed         |
|--------|--------|-----------|----------------------|----------------------|
| Met-up | 18     | Up        | 3.90450610249243e-09 | 3.91018721625765e-09 |

c-Met up signature genes

B

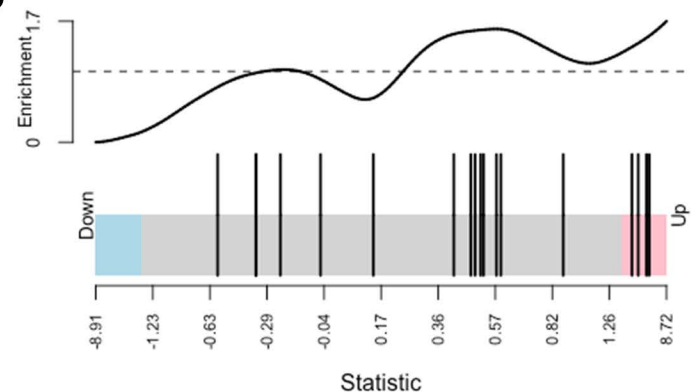

C

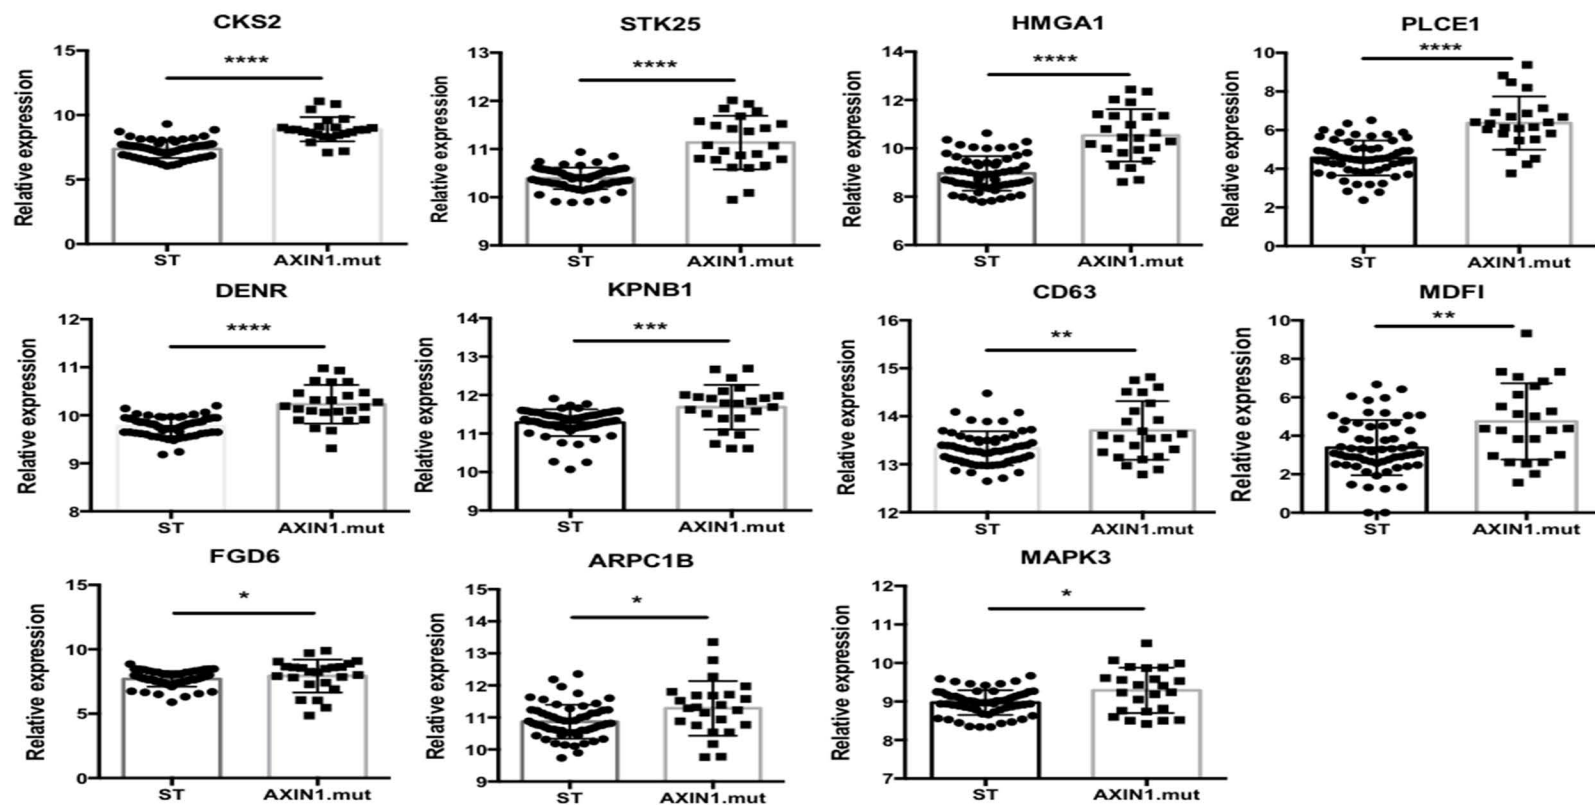

# Sup. Figure 3

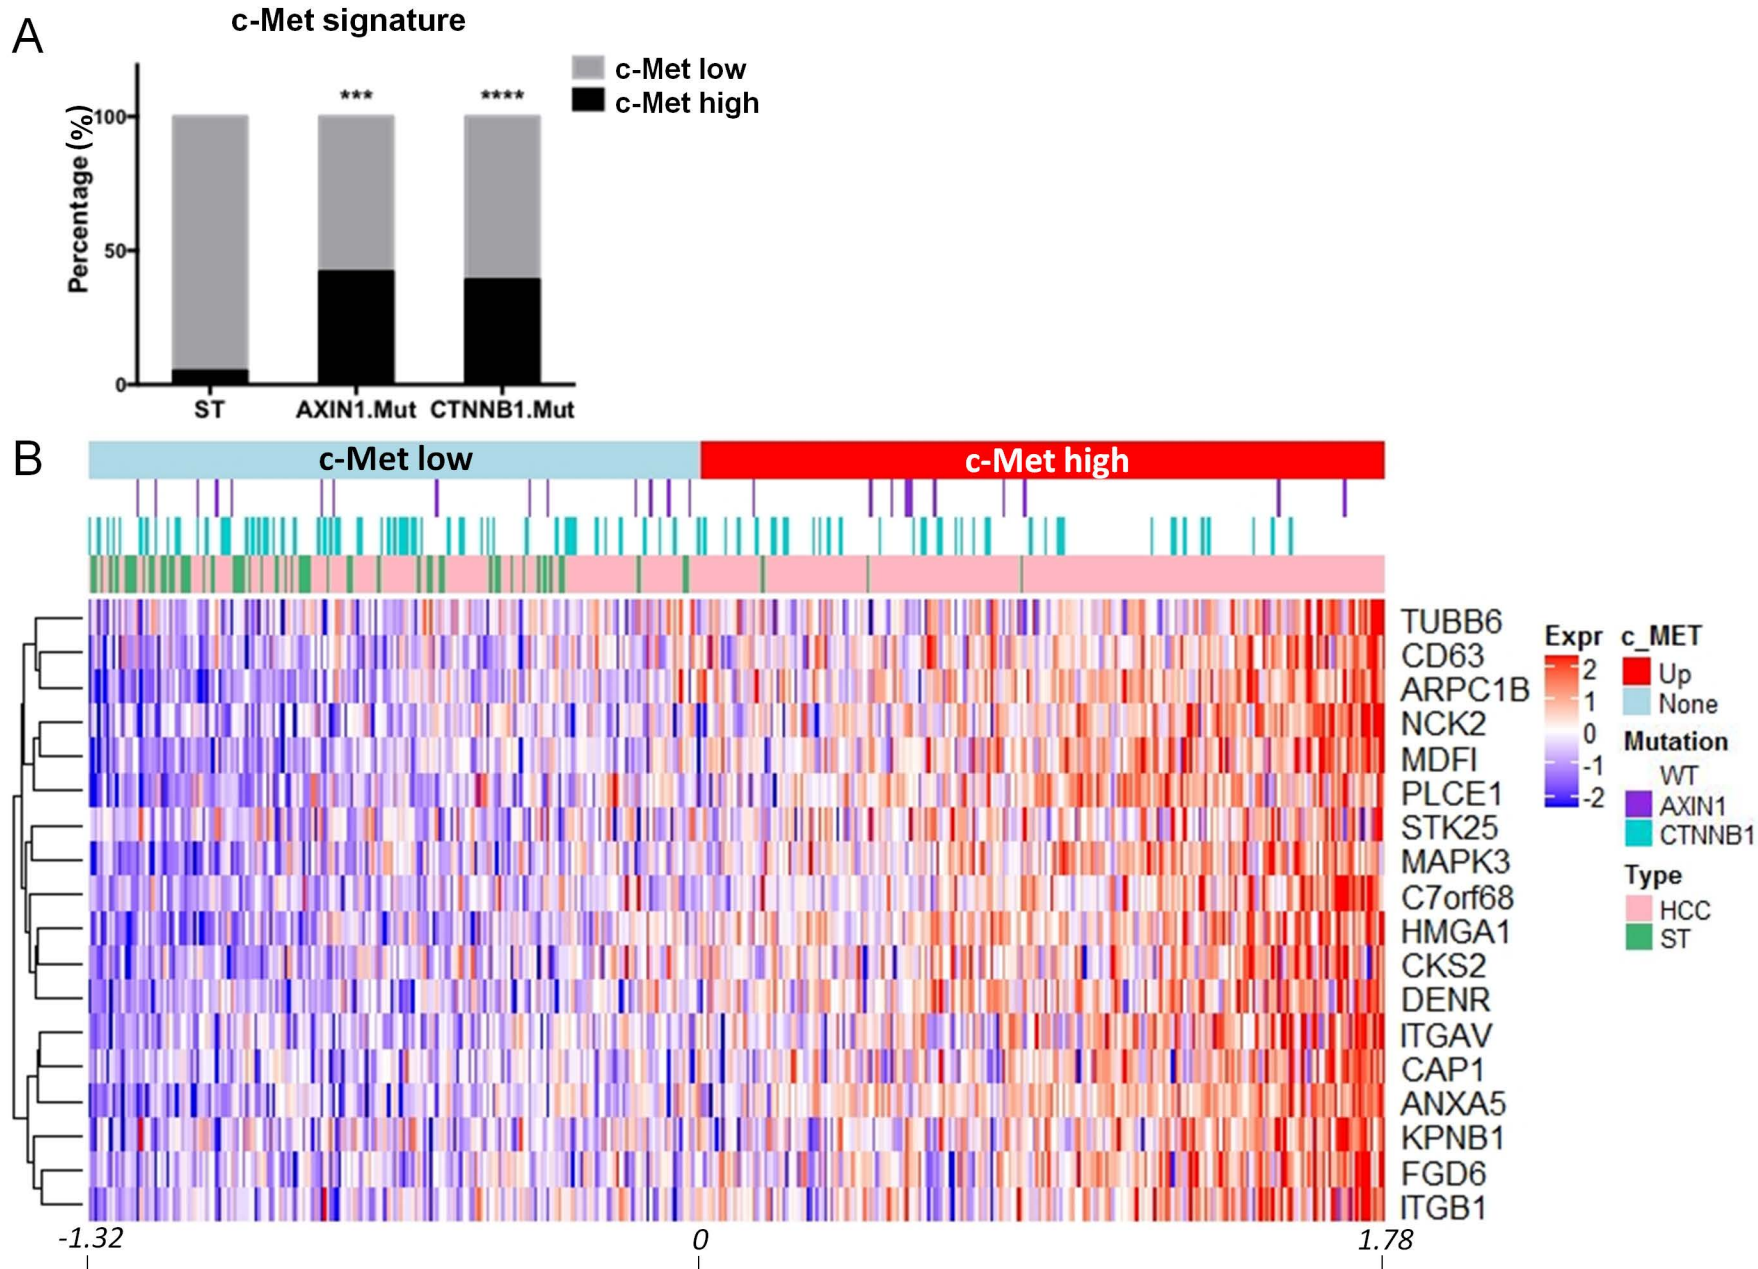

Sup. Figure 4

A

H&E

c-Met

100X

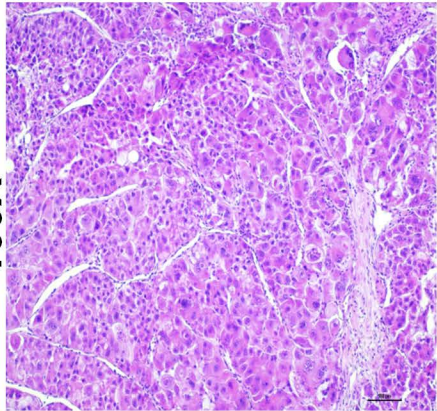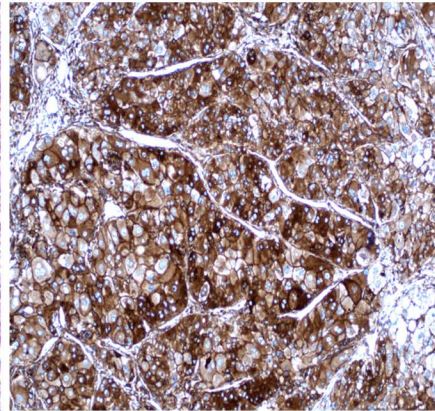

200X

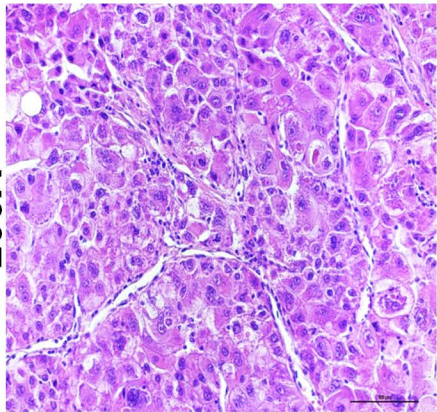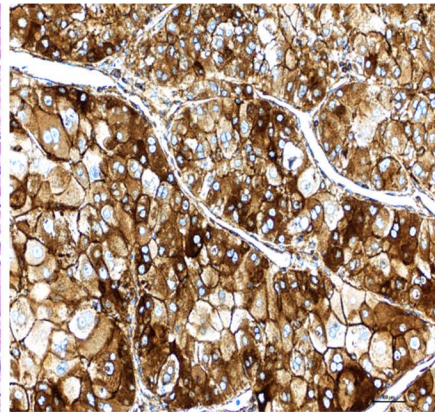

B

H&E

c-Met

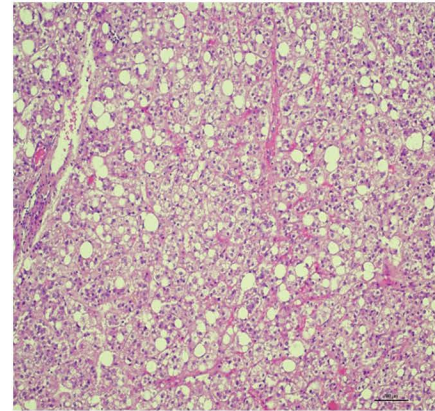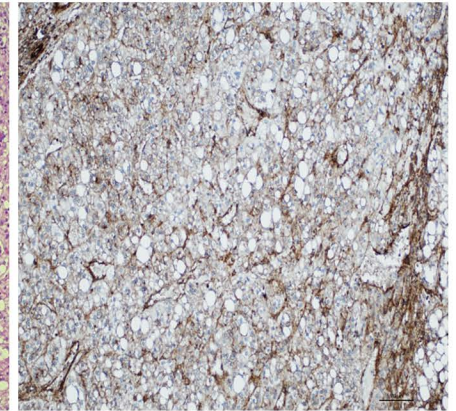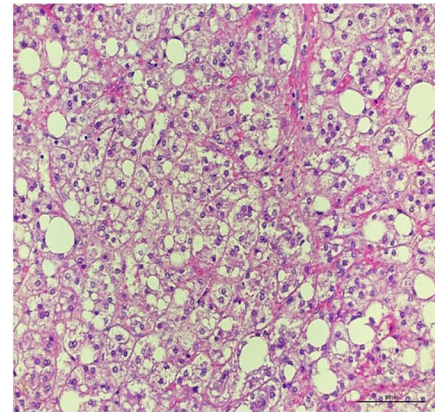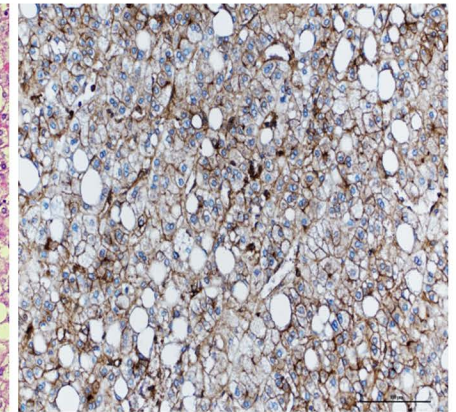

# Sup. Figure 5

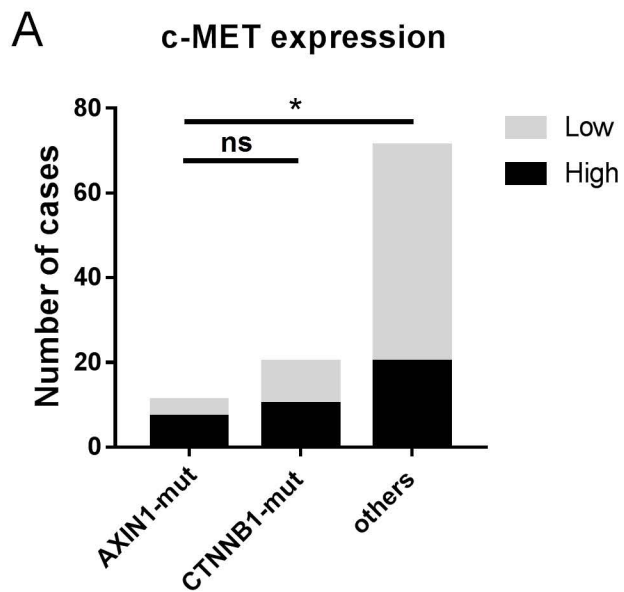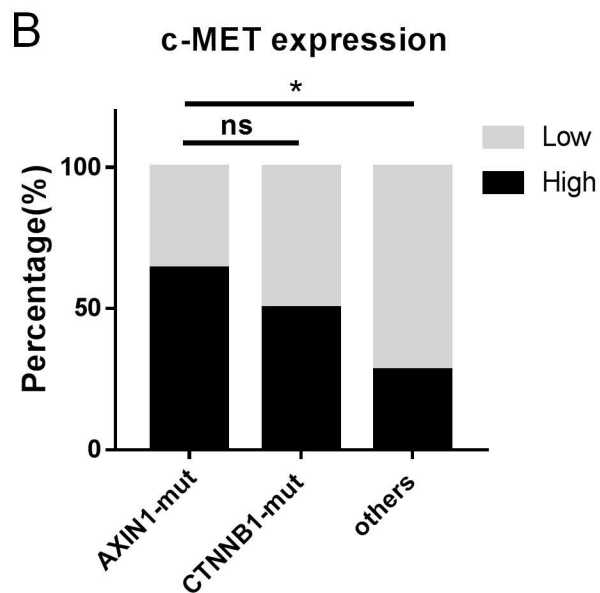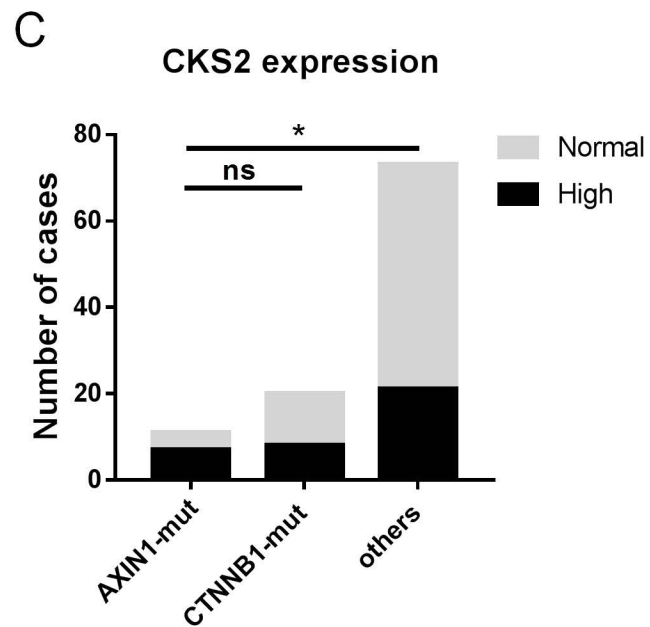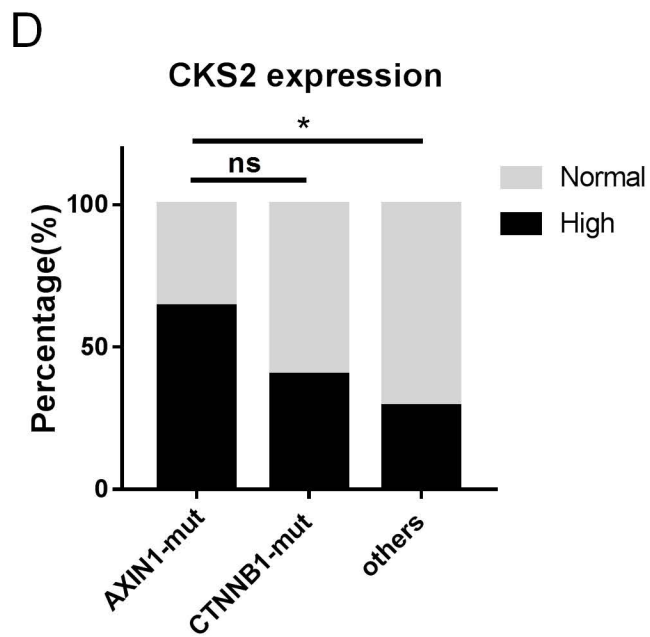

# Sup. Figure 6

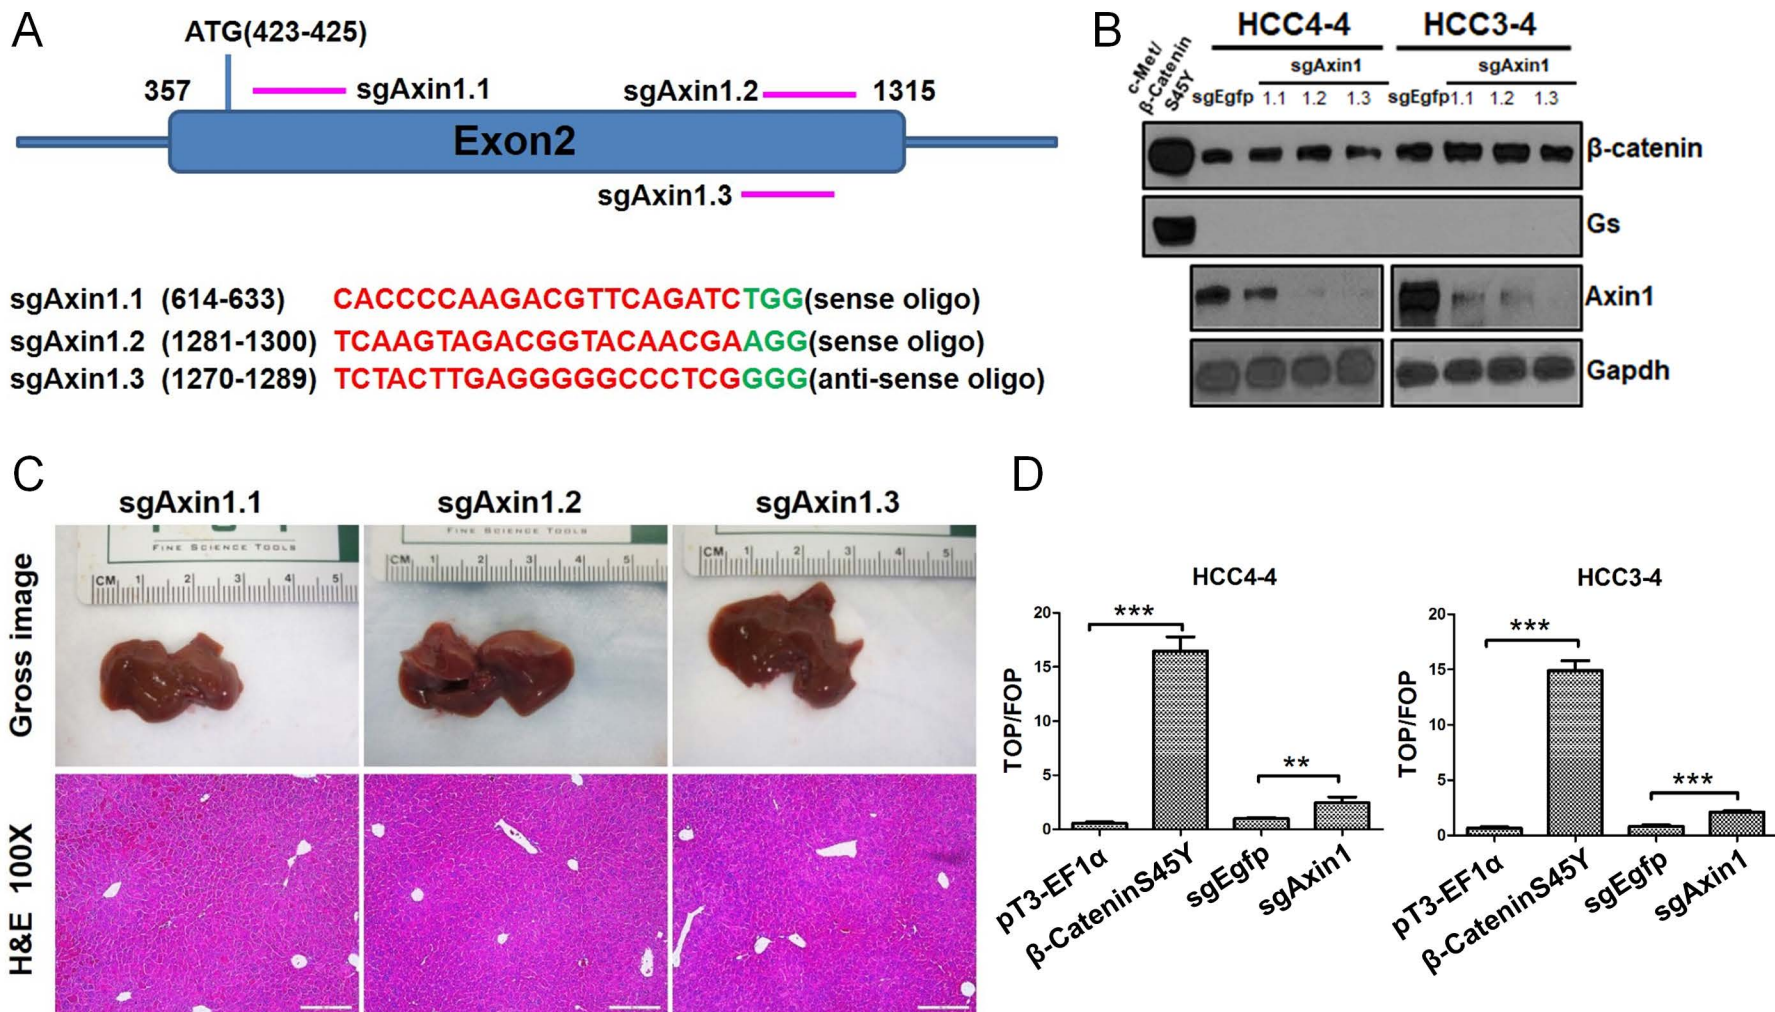

# Sup. Figure 7

Gross image

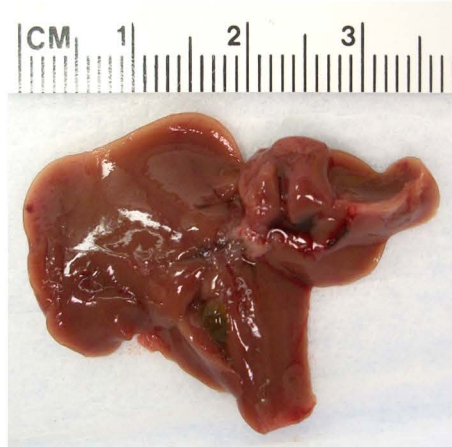

c-Met (37w.p.i)  
100X

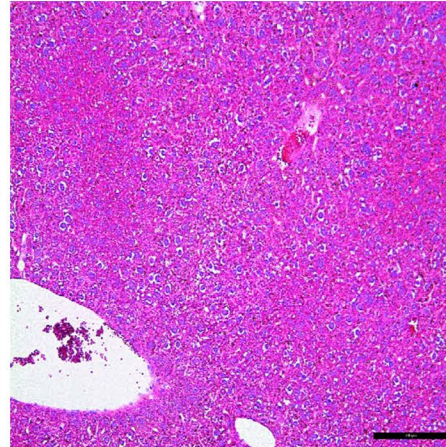

c-Met (37w.p.i)  
200X

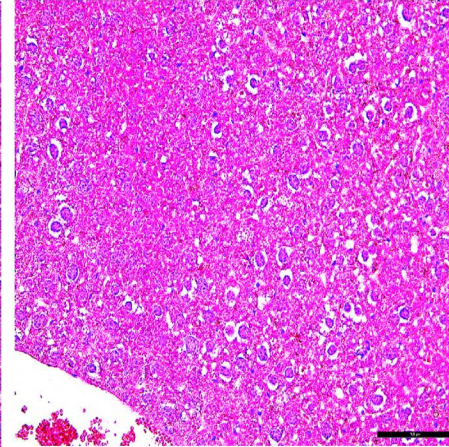

# Sup. Figure 8

c-Met/sgAxin1

20x

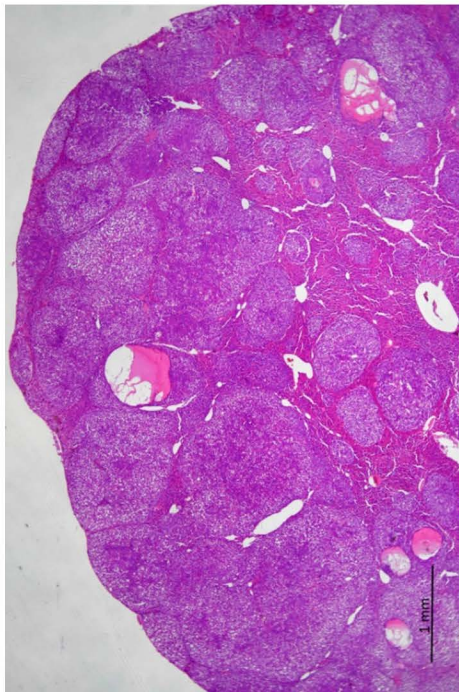

200x

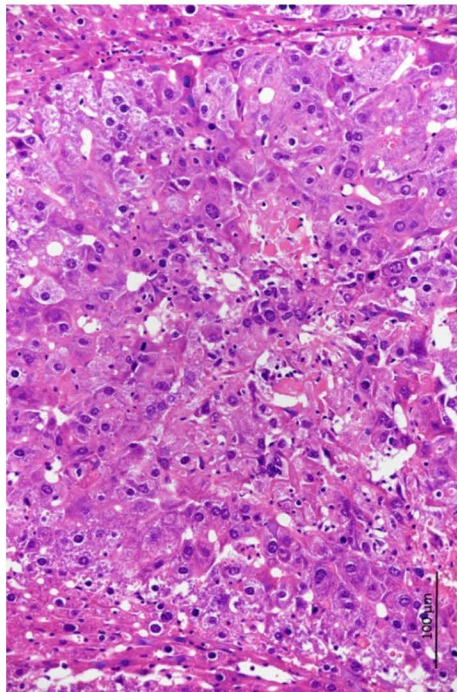

c-Met/ $\Delta$ N90- $\beta$ -Catenin

20x

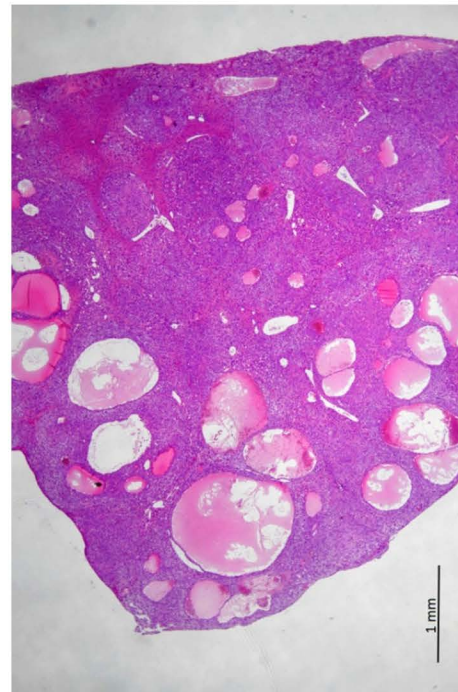



# Sup. Figure 9

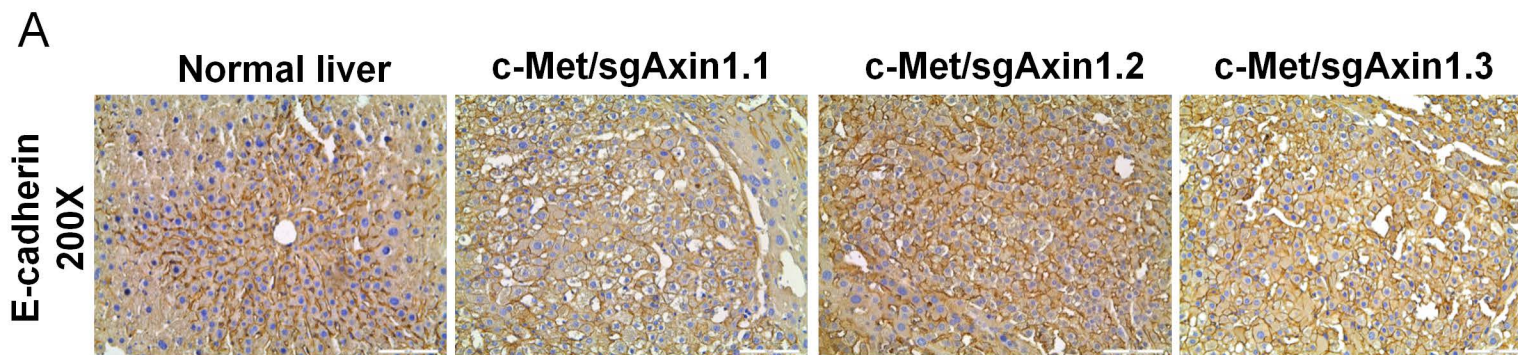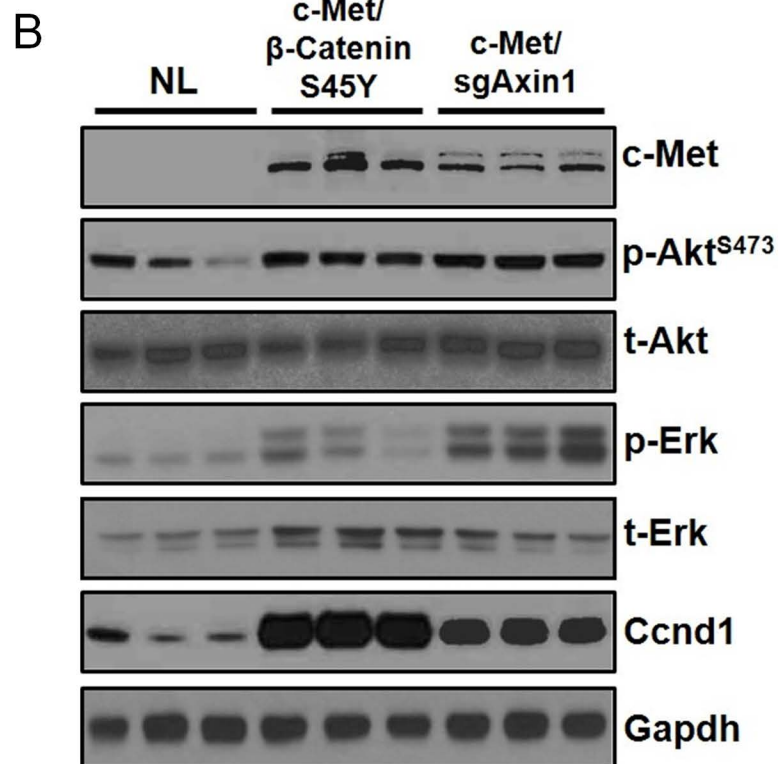

# Sup. Figure 10

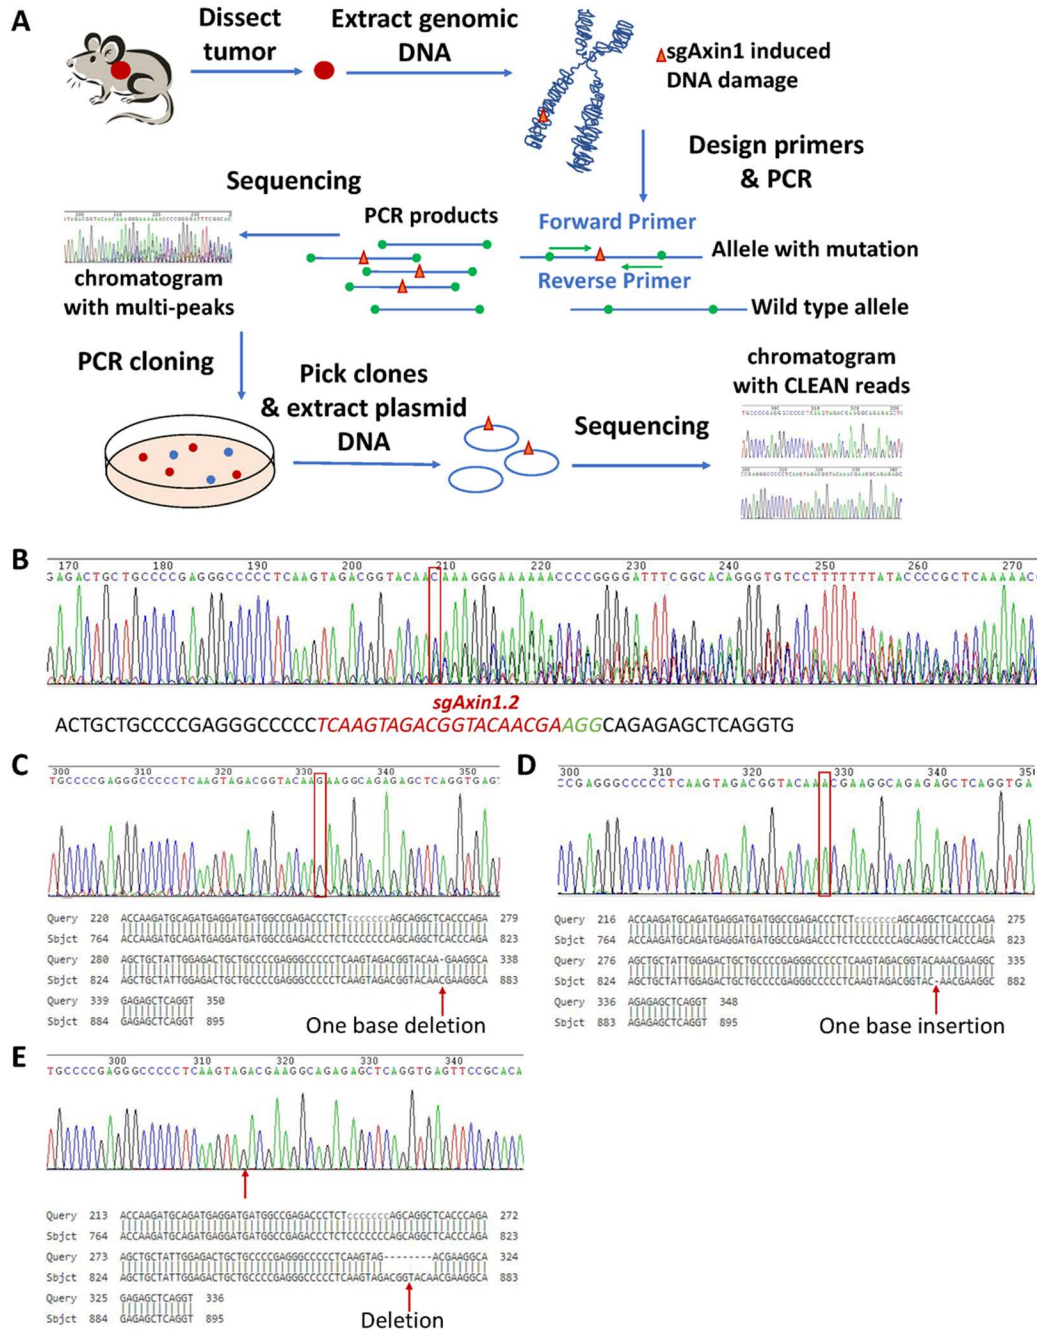

Sup. Figure 11

c-Met/ $\Delta$ N90- $\beta$ -Catenin

c-Met/sgAxin1

Gs 200X

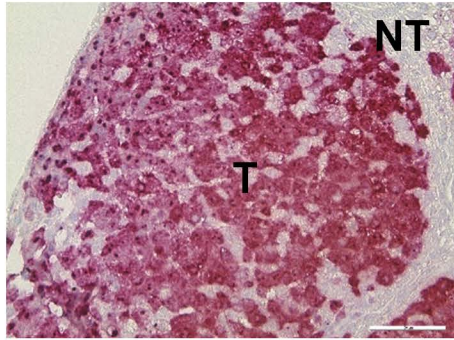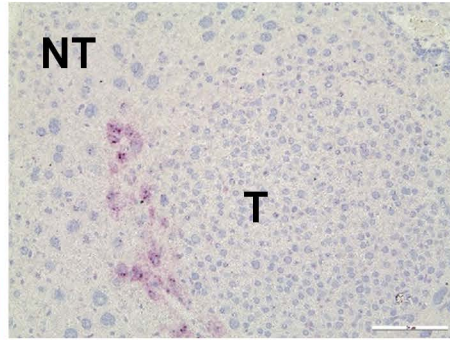

Axin2 200X

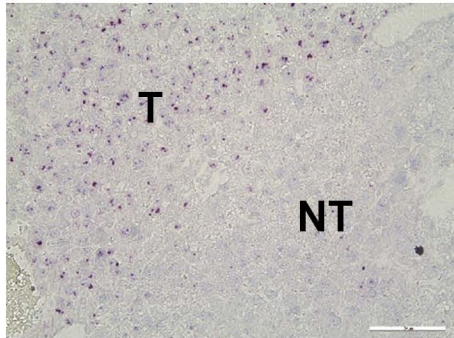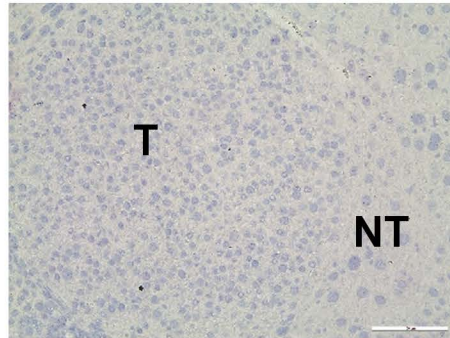

# Sup. Figure 12

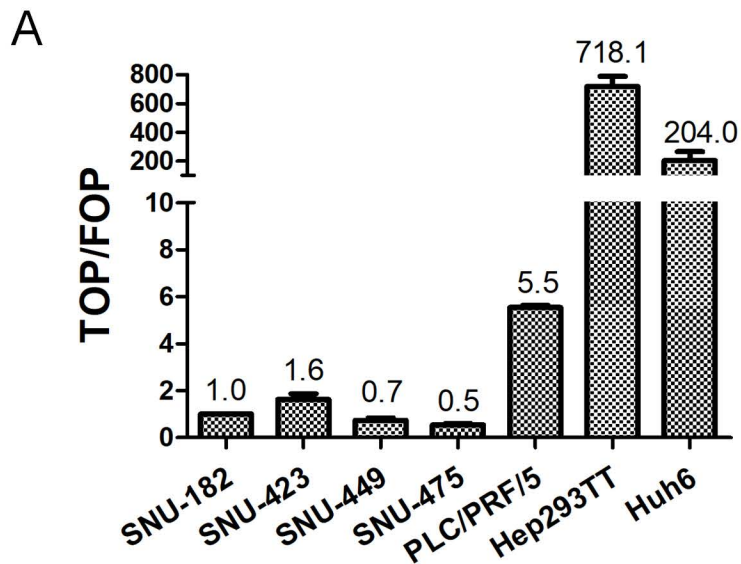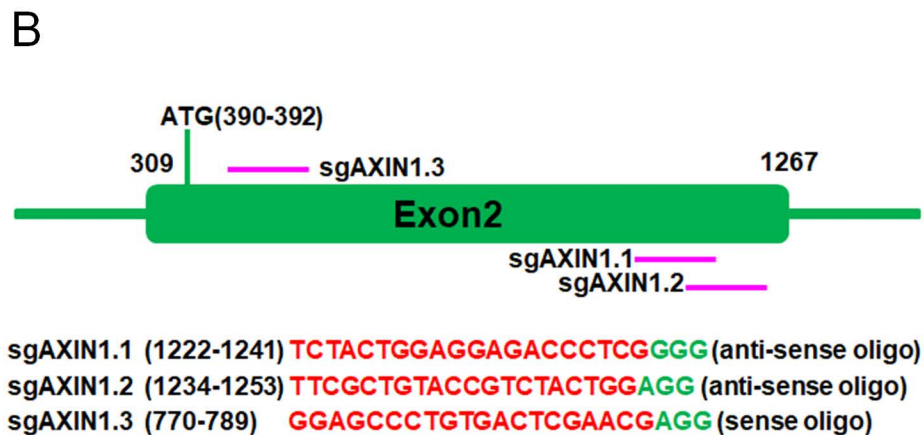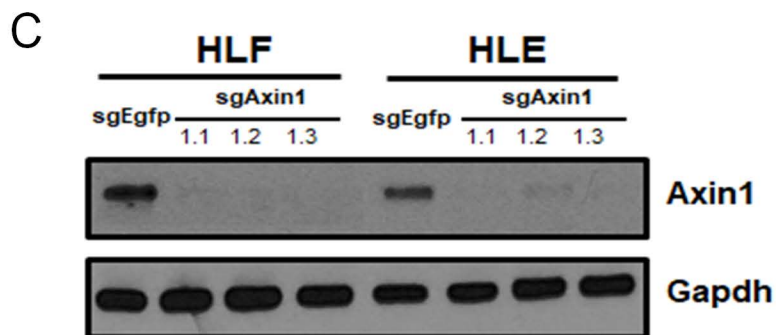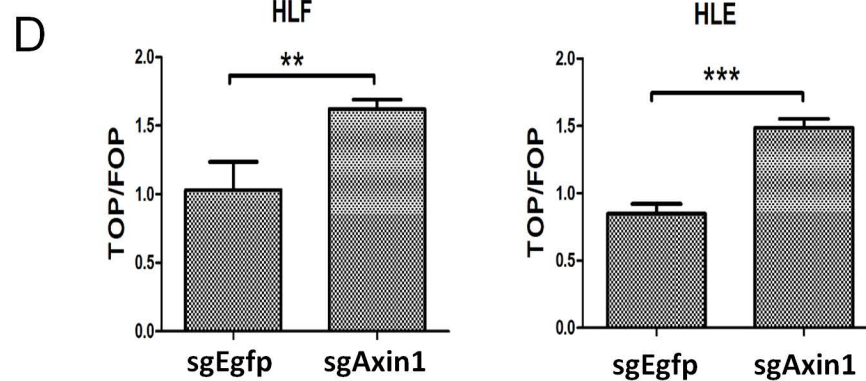

Sup. Figure 13

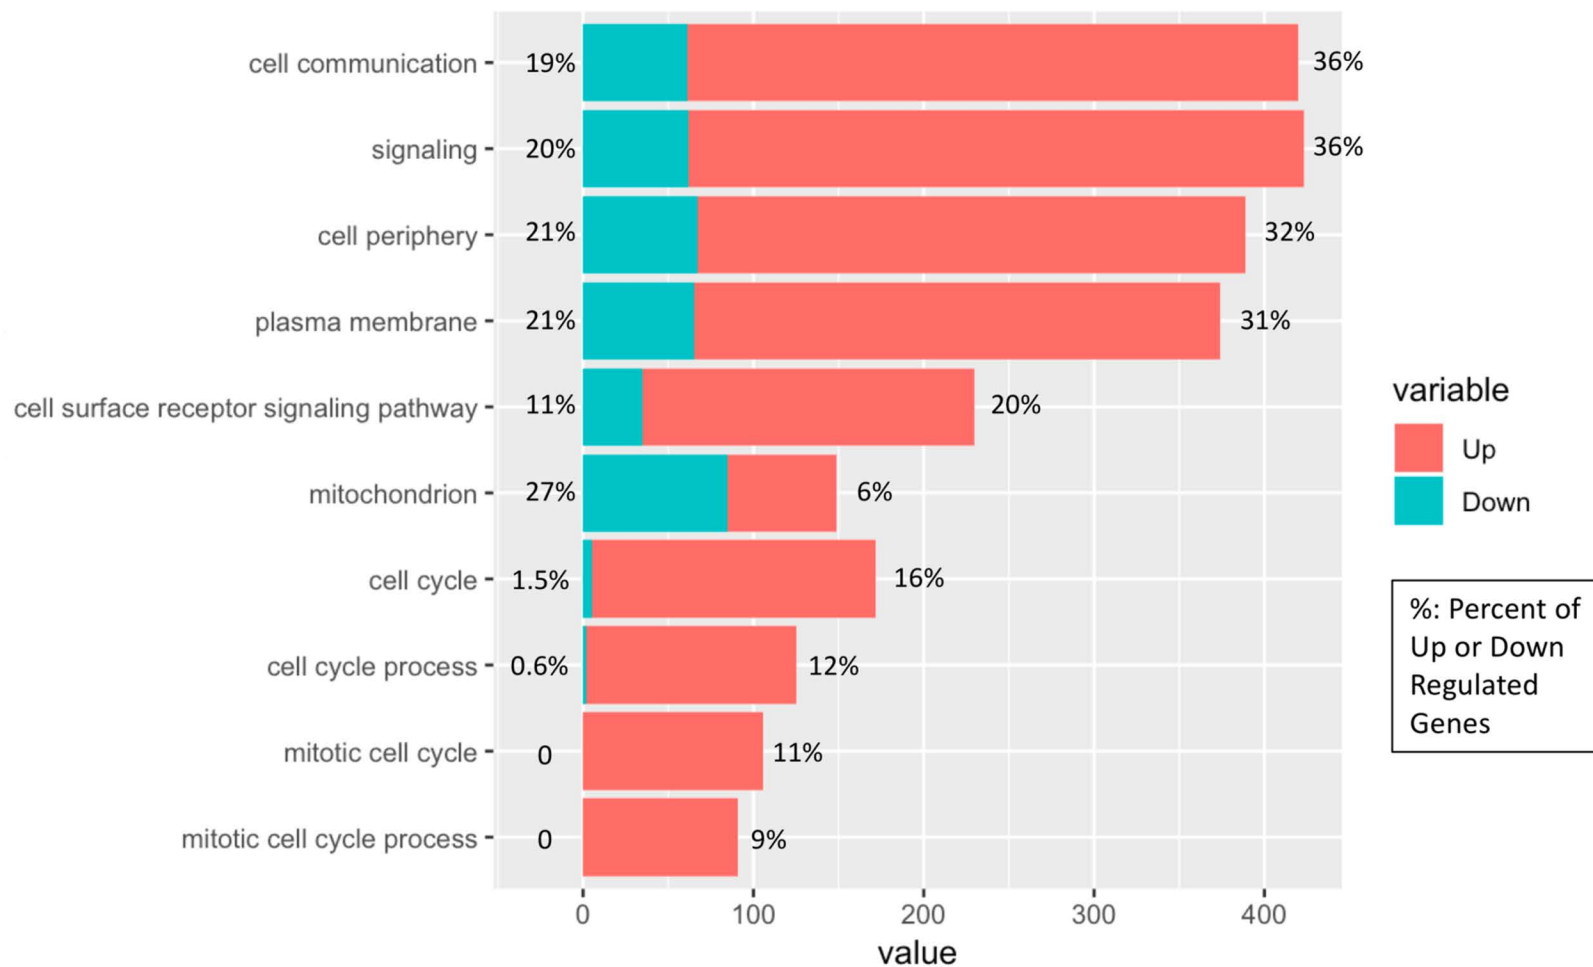

Sup. Figure 14

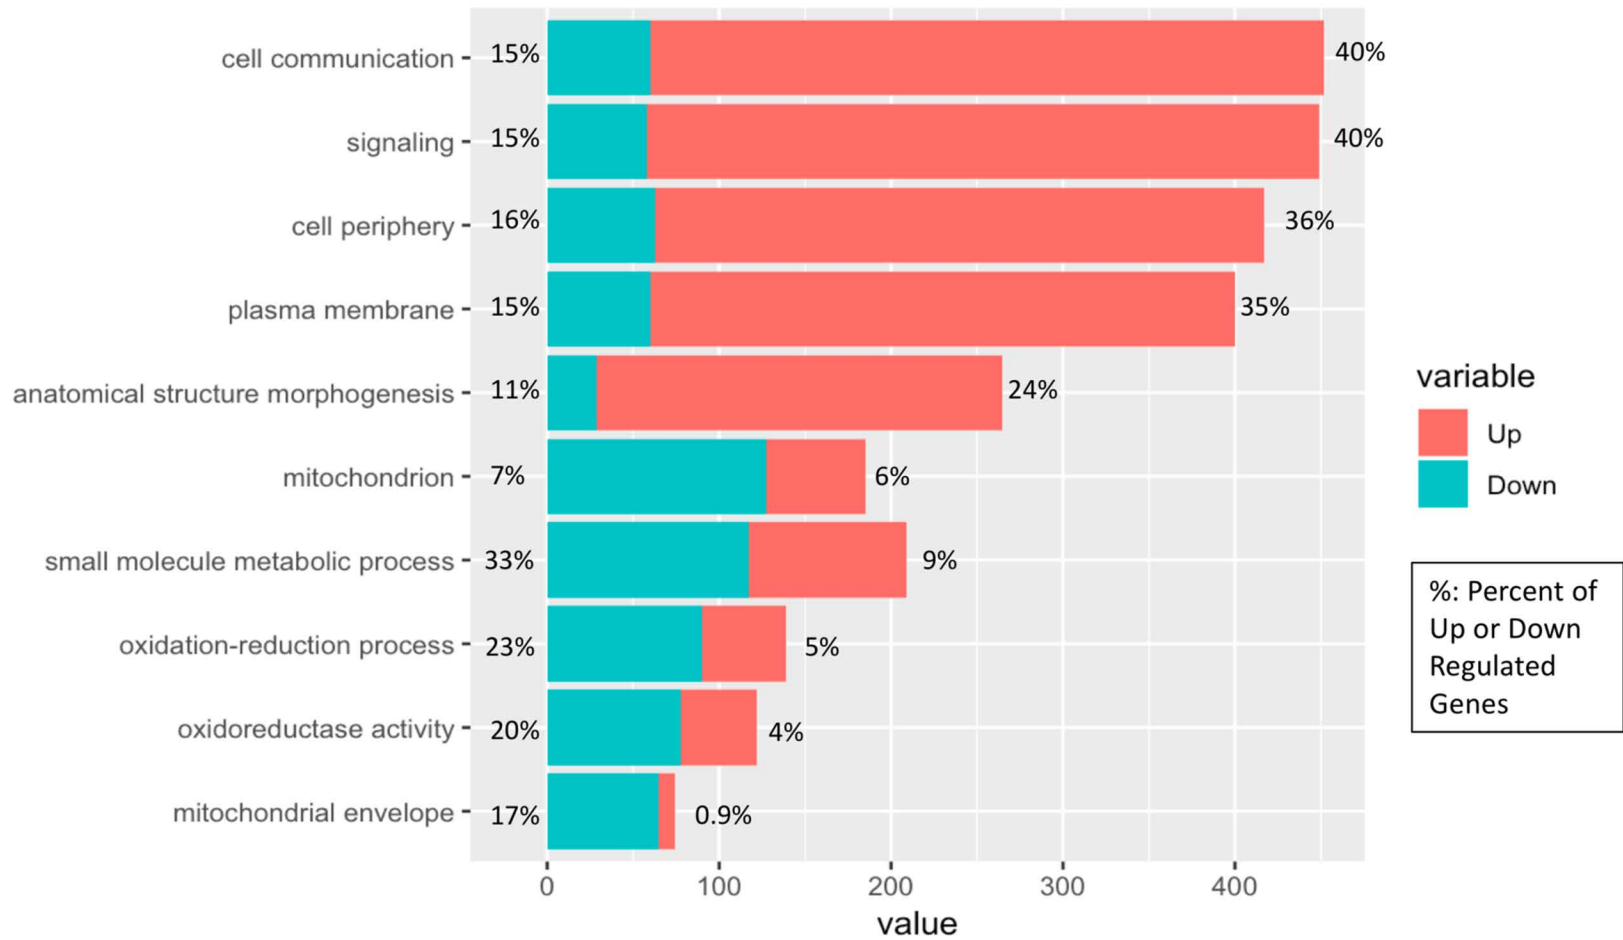

# Sup. Figure 15

A

| Bcat vs NL |                       |        |           |          |              |
|------------|-----------------------|--------|-----------|----------|--------------|
| GO ID      | Term                  | NGenes | Direction | PValue   | PValue.Mixed |
| GO:0043491 | AKT Signaling Pathway | 139    | Up        | 5.92E-06 | 8.82E-07     |
| KEGG ID    | Term                  | NGenes | Direction | PValue   | PValue.Mixed |
| mmu04151   | AKT Signaling Pathway | 271    | Up        | 4.65E-05 | 7.42E-07     |

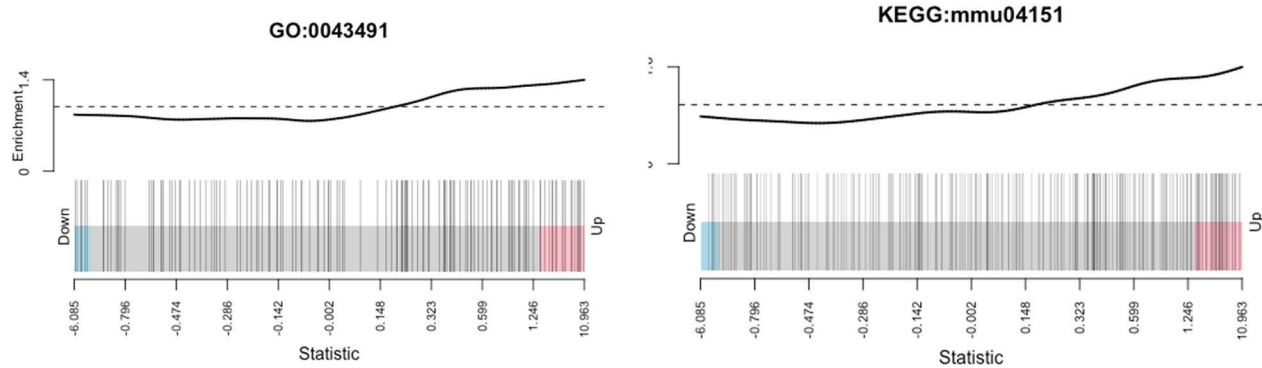

B

| sgAxi vs NL |                       |        |           |          |              |
|-------------|-----------------------|--------|-----------|----------|--------------|
| GO ID       | Term                  | NGenes | Direction | PValue   | PValue.Mixed |
| GO:0043491  | AKT Signaling Pathway | 139    | Up        | 5.10E-07 | 2.72E-07     |
| KEGG ID     | Term                  | NGenes | Direction | PValue   | PValue.Mixed |
| mmu04151    | AKT Signaling Pathway | 271    | Up        | 7.28E-06 | 6.18E-07     |

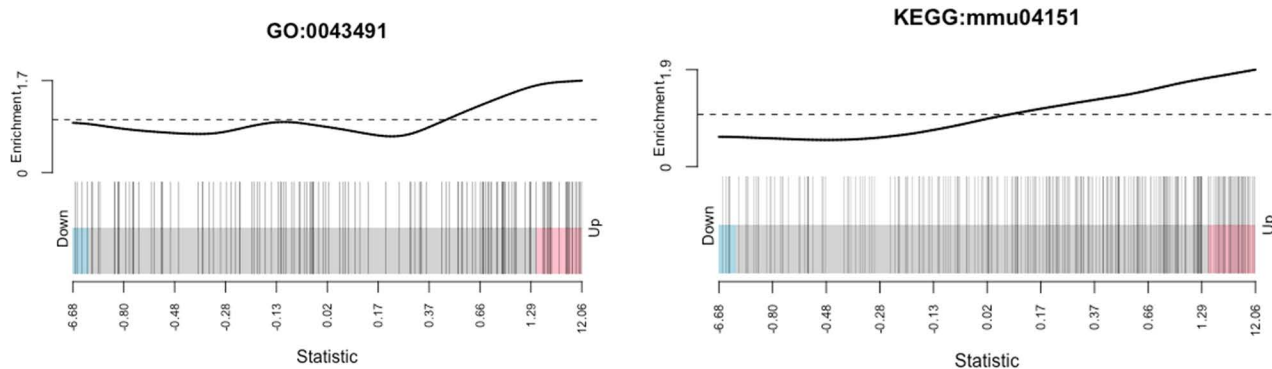

# Sup. Figure 16

A

*Ctnnb1<sup>ff</sup>* mice

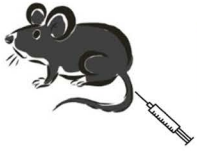

Hydrodynamic injection of c-Met/ $\Delta$ N90- $\beta$ -Catenin/Cre

Sacrifice when moribund

B

c-Met/ $\Delta$ N90- $\beta$ -Catenin/  
Cre (4.7W.p.i)

H&E 100X

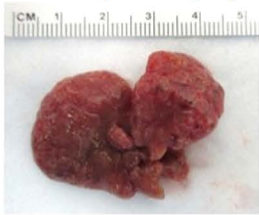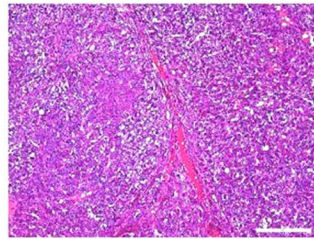

$\beta$ -Catenin  
200X

Myc tag  
200X

Ki-67  
200X

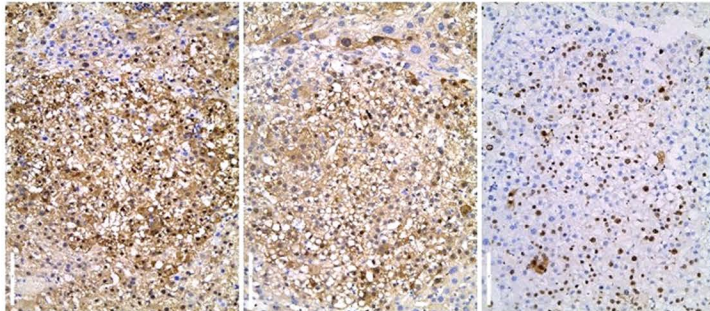

C

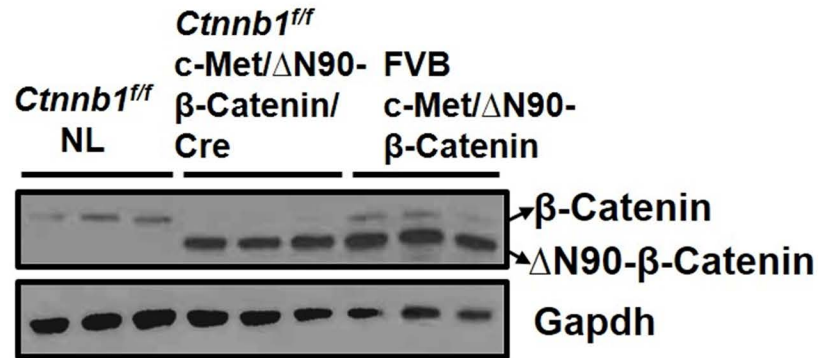



# Sup. Figure 17

A

*Ctnnb1<sup>ff</sup>* mice

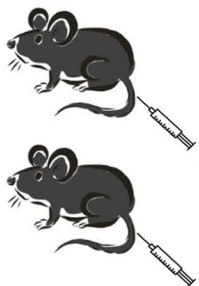

Hydrodynamic injection of c-Met/sgAxin1/pCMV

Hydrodynamic injection of c-Met/sgAxin1/Cre

Sacrifice when moribund

B

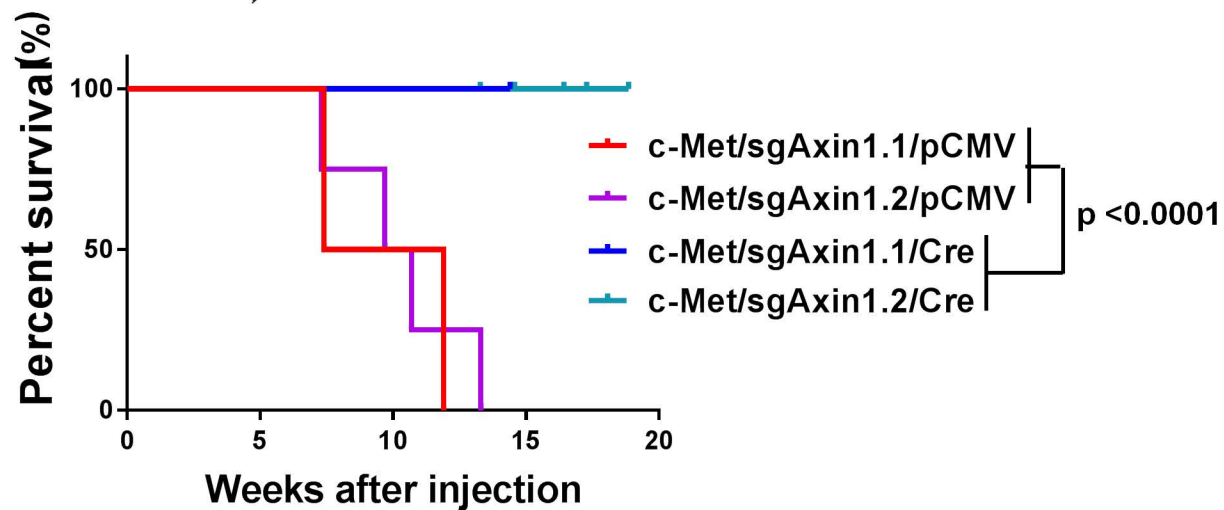

# Sup. Figure 18

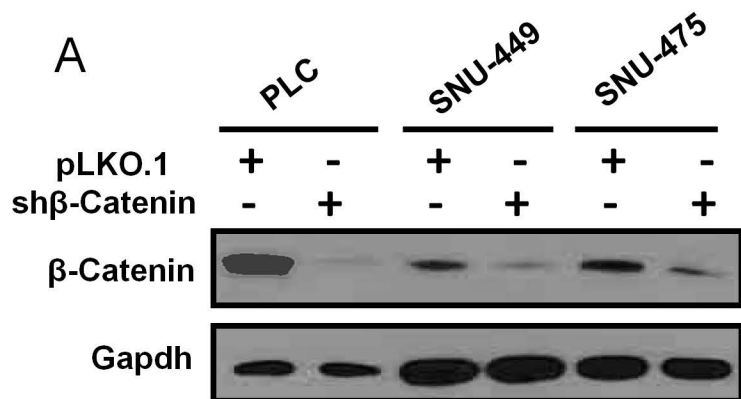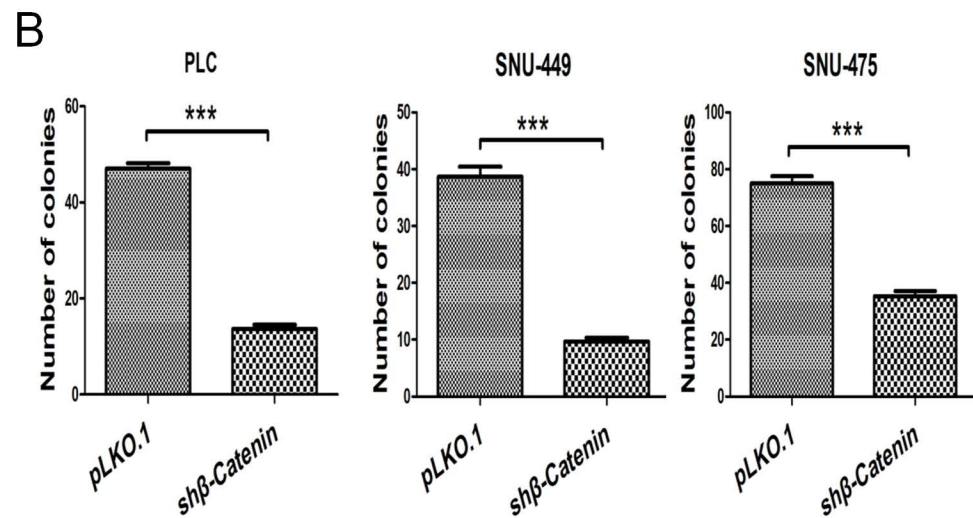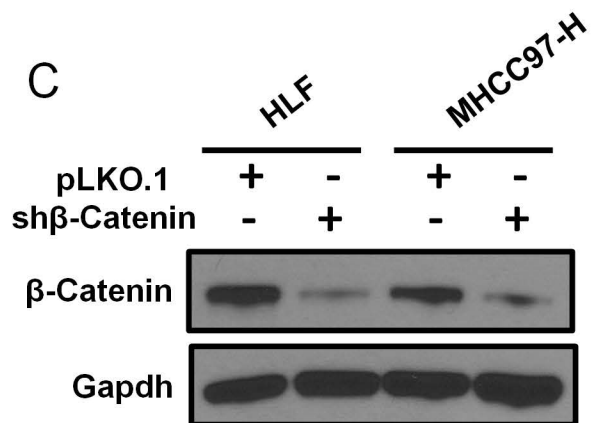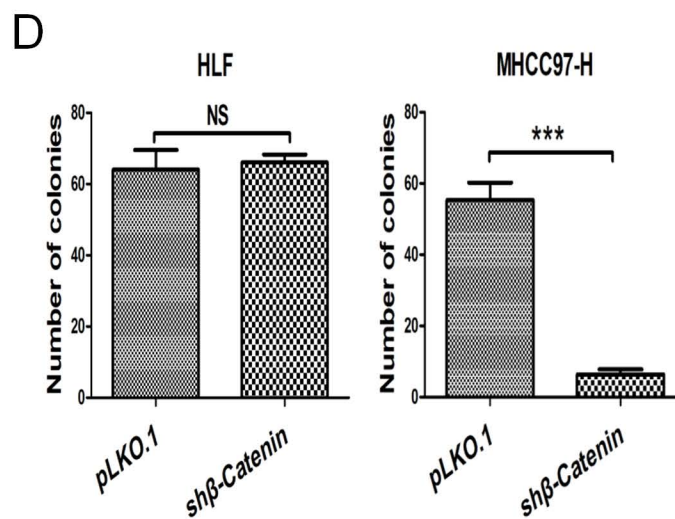

# Sup. Figure 19

## A

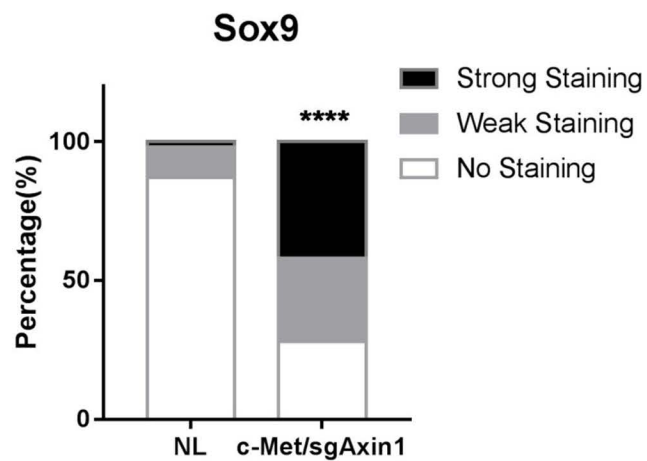

## B

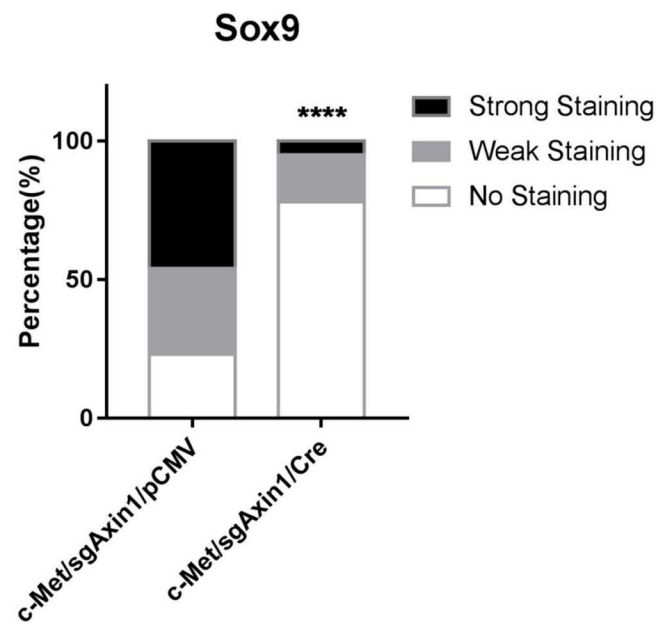

# Sup. Figure 20

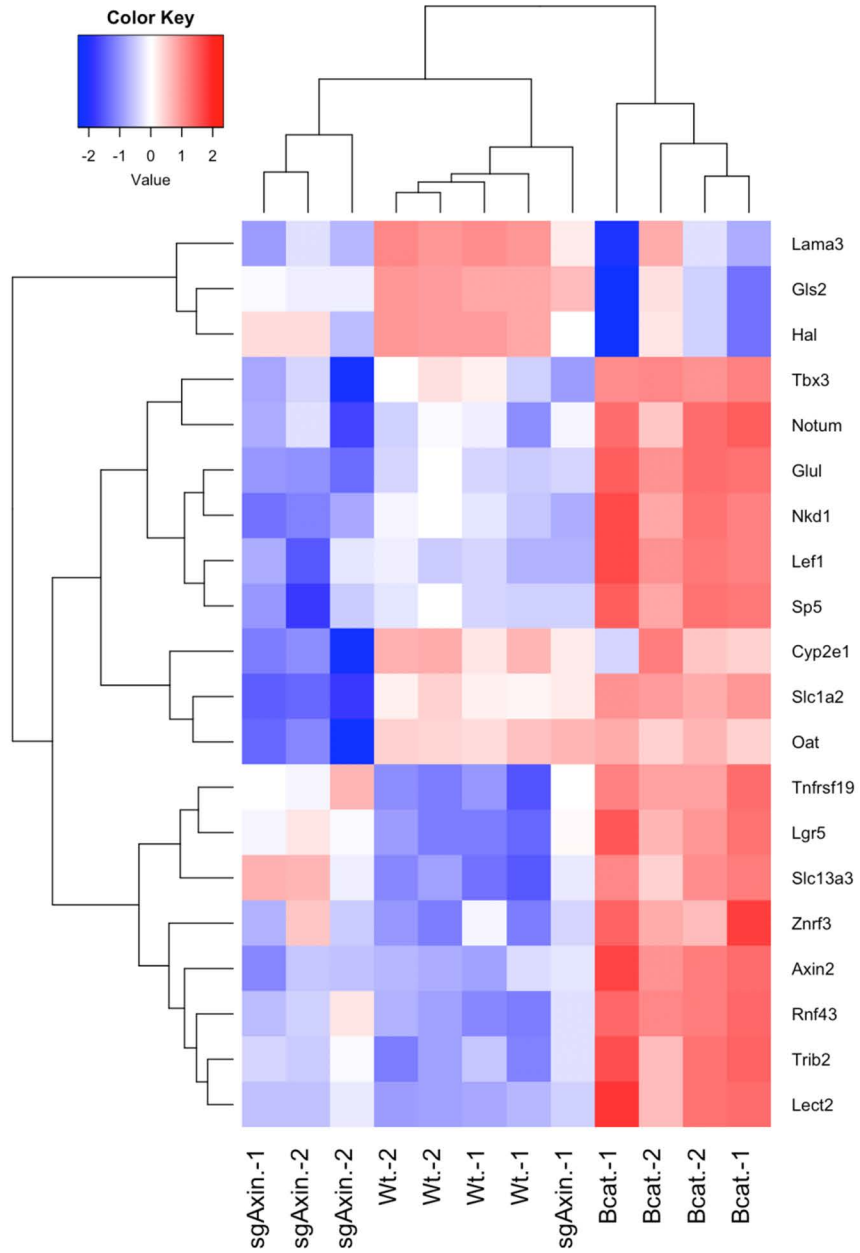

## Supplementary Figure Legends

**Supplementary Figure 1. *AXIN1* status and c-MET expression in human HCC cell lines.** (A) Western blot analysis of AXIN1 protein levels in a panel of 8 human HCC cell lines (SNU-182, SNU-423, SNU-449, SNU-475, PLC/PRF/5, SNU-398, MHCC97-H, and Huh7) and 3 human hepatoblastoma cell lines (HepG2, Hep293TT, and Huh6) with *CTNNB1* mutations. (B) Western blot analysis of p-MET and c-MET protein levels in the 8 human HCC cell lines. GAPDH was used as a loading control.

**Supplementary Figure 2. Upregulation of c-MET\_UP gene signature in *AXIN1* mutant human HCC samples based on the TCGA data set.** (A) and (B) c-MET\_UP signature was evident in human HCC samples with *AXIN1* mutations using FRY analysis. (C) Eleven of eighteen c-MET\_UP genes were expressed at higher levels in *AXIN1* mutant human HCC when compared with surrounding liver tissues (ST).

**Supplementary Figure 3. A subset of *AXIN1* mutant HCC samples shows c-MET activation based on the TCGA data set.** (A) c-MET signature is enriched in *AXIN1* mutant as well as *CTNNB1* mutant human HCC samples; (B) Heatmap of the human TCGA samples depicting

*CTNNB1* and *AXIN1* mutations and inferred c-MET activation. \*\*\*,  $p < 0.001$ .

**Supplementary Figure 4. Immunohistochemical patterns of human HCC harboring *AXIN1* mutations.** (A) Moderately-differentiated trabecular HCC harboring a GAG→TAG mutation at codon 443 displaying strong membranous and cytoplasmic (a sign of its activation) immunoreactivity for c-Met. (B) A solid, clear-cell HCC with a TGG→TGA mutation at codon 284 exhibiting low membranous c-Met immunolabeling. Scale bar: 100 $\mu$ m. Abbreviation: H&E, hematoxylin and eosin staining.

**Supplementary Figure 5. Expression pattern of c-MET and its downstream target, CKS2, in human HCC samples.** (A) (B) Number of cases and percentage of samples with low and high expression of c-MET. (C) (D) Number of cases and percentage of samples with normal and high expression of CKS2. For CKS2, “high expression” indicates at least 2-fold increase in HCC when compared with corresponding non-tumorous livers, whereas “low expression” indicates lower or equal expression of CKS2 in tumors and non-tumorous tissues.

**Supplementary Figure 6. Construction and validation of CRISPR/Cas9 plasmids for Axin1 in mouse.** (A) Schematic representation of

---

pX330-sgAxin1. Three different target sites (red) followed by the PAM sequence (green) in mouse *Axin1* gene. Short horizontal line (pink) indicates the three sgRNA target sites used here. **(B)** Western blot analysis of three kinds of lentiCRISPRv2-Axin1 (mouse) and lentiCRISPRv2-EGFP plasmid transfected into HCC3-4 and HCC4-4 cell line. **(C)** Gross and H&E images of mice livers injected with three sgAxin1 constructs individually. Magnifications: 100, scale bar: 200 $\mu$ m. **(D)** TCF/LEF reporter activity in HCC3-4 and HCC4-4 mouse HCC cell lines following transfection of pT3-EF1 $\alpha$ , pT3-EF1 $\alpha$ - $\beta$ -CateninS45Y, lentiCRISPRv2-sgEgfp, and lentiCRISPRv2-sgAxin1. Data were analyzed using TopFlash/FopFlash reporter assays and are presented as mean  $\pm$  SD. \*\*,  $p < 0.01$ ; \*\*\*,  $p < 0.001$ .

**Supplementary Figure 7. Gross and H&E images of mouse livers injected with c-Met.** Samples were harvested 37 weeks post injection of c-Met. Magnifications: 100, scale bar: 200 $\mu$ m; magnification: 200, scale bar: 100 $\mu$ m.

**Supplementary Figure 8. Representative H&E staining.** Sections of c-Met/sgAxin1 and c-Met/ $\beta$ -catenin tumors. Magnification: 20, scale bar: 1mm; magnification: 200, scale bar: 100 $\mu$ m.

**Supplementary Figure 9. Molecular and biochemical analyses of c-Met/sgAxin1 mouse HCC.** (A) Immunohistochemical staining of E-Cadherin in normal liver, c-Met/sgAxin1.1, c-Met/sgAxin1.2, and c-Met/sgAxin1.3 HCCs. Magnification: 200, scale bar: 100 $\mu$ m. (B) Western blot analysis of proteins downstream of c-Met. Proteins were extracted from normal liver (NL), c-Met/ $\beta$ -CateninS45Y and sgAxin1/c-Met tumor tissues. Gapdh was used as a loading control.

**Supplementary Figure 10. Genomic sequencing and validation of Axin1 deletion in mouse HCCs.** (A) Illustration of the genomic sequencing. Tumors were isolated carefully from normal liver tissue and genomic DNA was extracted. Specific primers were designed to amplify the sequences with/without sgAxin1.2 induced mutation using PCR. Subsequently, chromatograms of sequencing of the PCR products showed multi-colored peaks indicating different reads starting within the sgAxin1 locus (B). Then, we employed PCR cloning to obtain different clones harboring Axin1 wild-type or mutated sequences. Through the sequencing of the plasmids collected from each individual clone, we identified several mutations caused by sgAxin1.2. (C) (D) (E) Representative mutations caused by sgAxin1.2.

**Supplementary Figure 11. *In Situ* Hybridization (ISH) of Gs and Axin2 in c-Met/ $\Delta$ N90- $\beta$ -Catenin, and c-Met/sgAxin1 tumors.** Samples



---

were harvested 9 weeks p.i. Magnification: 200, scale bar: 100 $\mu$ m.

**Supplementary Figure 12. CRISPR/Cas9 plasmids for *AXIN1* in human HCC cell lines.** **(A)** TCF/LEF reporter activity in a panel of 5 human HCC cell lines (SNU-182, SNU-423, SNU-449, SNU-475, PLC/PRF/5) and 2 strong Wnt/ $\beta$ -Catenin activated human hepatoblastoma cell lines (Hep293TT and Huh6) analyzed using the TopFlash/FopFlash reporter assays. Data are presented as mean  $\pm$  SD. **(B)** Schematic representation of LentiCRISPRv2-sgAXIN1. Three different target sites (red) followed by the PAM sequence (green) in human *AXIN1* gene. Short horizontal lines (pink) indicate the three sgRNA target sites used here. **(C)** Western blot analysis confirmed diminished expression of AXIN1 after transfection in HLE and HLF human HCC cell lines. GAPDH was used as a loading control. **(D)** TCF/LEF reporter activity in HLE and HLF cell lines following the transfection of lentiCRISPRv2-sgEGFP and lentiCRISPRv2-sgAxin1 analyzed using the TopFlash/FopFlash reporter assays. Data are presented as mean  $\pm$  SD. \*\*,  $p < 0.01$ ; \*\*\*,  $p < 0.001$ .

**Supplementary Figure 13. c-Met/ $\Delta$ N90 $\beta$ -Catenin HCC vs Wild-Type: 10 most statistically significant differentially expressed gene ontologies**

**Supplementary Figure 14. c-Met/sgAxin1 HCC vs Wild-Type: 10 most statistically significant differentially expressed gene ontologies**

**Supplementary Figure 15. Akt signaling pathway is upregulated in c-Met/ $\Delta$ N90 $\beta$ -Catenin HCC and c-Met/sgAxin1 mouse HCC samples using RNA-Seq data. (A)** Akt signaling pathway is upregulated in c-Met/ $\Delta$ N90 $\beta$ -Catenin HCC samples; **(B)** Akt signaling pathway is upregulated in c-Met/sgAxin1 HCC samples.

**Supplementary Figure 16. c-Met/ $\Delta$ N90 $\beta$ -Catenin/Cre induced HCC formation in *Ctnnb1<sup>fl/fl</sup>* mouse. (A)** Study design. **(B)** Gross images of livers, H&E, and immunohistochemistry (IHC) of c-Met/ $\Delta$ N90- $\beta$ -Catenin/Cre *Ctnnb1<sup>fl/fl</sup>* mouse livers. Magnifications: 100, scale bar: 200 $\mu$ m; 200, scale bar: 100 $\mu$ m. **(C)** Western blot analysis of normal liver and c-Met/ $\Delta$ N90- $\beta$ -Catenin/Cre tissues in *Ctnnb1<sup>fl/fl</sup>* mice as well as c-Met/ $\Delta$ N90- $\beta$ -Catenin tumors in FVB mice showing the absence of endogenous  $\beta$ -Catenin in c-Met/ $\Delta$ N90- $\beta$ -Catenin/Cre lesions. Gapdh was used as a loading control.

**Supplementary Figure 17. Injection of c-Met/sgAxin1/pCMV and c-Met/sgAxin1/Cre in *Ctnnb1<sup>fl/fl</sup>* mice using sgAxin1.1 and sgAxin1.2.**

**(A)** Study design. **(B)** Survival curve of c-Met/sgAxin1.1/pCMV (n=2), c-Met/sgAxin1.1/Cre (n=3), c-Met/sgAxin1.2/pCMV (n=4), and c-Met/sgAxin1.2/Cre (n=10).

**Supplementary Figure 18. Proliferation in human HCC cell lines after silencing of  $\beta$ -CATENIN.** **(A)** Western blot analysis revealing the reduced expression of  $\beta$ -CATENIN after transfection of pLKO.1-sh- $\beta$ -CATENIN in *AXIN1* mutant or null human HCC cell lines (SNU-449, SNU-475 and PLC/PRF/5). **(B)** Colony formation assays confirming the strong inhibition of proliferation following the silencing of  $\beta$ -CATENIN in SNU-449, SNU-475, and PLC/PRF/5 cells lines. **(C)** Western blot analysis revealing the diminished expression of  $\beta$ -CATENIN after transfection of pLKO.1-sh- $\beta$ -CATENIN in human HCC cell lines with wild-type *AXIN1* alleles (HLF and MHCC97-H). **(D)** Colony formation assays confirming the robust suppression of proliferation due to  $\beta$ -CATENIN silencing in the MHCC97-H cell line, but not in HLF cells. Data are presented as mean  $\pm$  SD. \*\*\*,  $p < 0.001$ .

**Supplementary Figure 19. Quantification of Sox9 immunohistochemistry.** **(A)** The expression of Sox9 was significantly increased in c-

Met/sgAxin1 HCC when compared to normal liver. **(B)** The expression of Sox9 in c-Met/sgAxin1/Cre injected *Notch2<sup>fl/fl</sup>* mice was significantly decreased when compared to that in c-Met/sgAxin1/pCMV injected *Notch2<sup>fl/fl</sup>* mice. \*\*\*, Chi-square test  $p < 0.001$ .

**Supplementary Figure 20. Heatmap of a gene list for  $\beta$ -Catenin activation signature in wild-type, c-Met/sgAxin1 and c-Met/ $\Delta$ N90 $\beta$ -Catenin HCC samples. Red, upregulated; blue, downregulated.**

**Supplementary Table 1.** Main characteristics of the plasmids used in the experiments

| Plasmid name                                         | Abbreviation                       | Promoter     | Gene name                      | Function          | Tag | Reference      | Vector type |
|------------------------------------------------------|------------------------------------|--------------|--------------------------------|-------------------|-----|----------------|-------------|
| pT3-EF1 $\alpha$                                     | pT3                                | EF1 $\alpha$ | N/A                            | Control           |     |                | human       |
| pT3-EF1 $\alpha$ -c-Met                              | c-Met                              | EF1 $\alpha$ | c-Met                          | Overexpression    |     |                | human       |
| pT3-EF1 $\alpha$ - $\beta$ -<br>CateninS45Y          | $\beta$ -<br>CateninS45Y           | EF1 $\alpha$ | $\beta$ -Catenin               | Overexpression    | Myc |                | human       |
| pT3-EF1 $\alpha$ - $\Delta$<br>N90- $\beta$ -Catenin | $\Delta$ N90- $\beta$ -<br>Catenin | EF1 $\alpha$ | $\beta$ -Catenin               | Overexpression    | Myc |                | human       |
| pT3-EF1 $\alpha$ -<br>dnRBPJ                         | dnRBPJ                             | EF1 $\alpha$ | RBPJ                           | Loss of function  | V5  |                | human       |
| pCMV                                                 | pCMV                               | CMV          | N/A                            | Control           |     |                | human       |
| pCMV-Cre                                             | Cre                                | CMV          | Cre recombinase                | Induce expression |     |                | Universal   |
| pCMV/SB                                              | SB                                 | CMV          | Sleeping Beauty<br>transposase | Induce expression |     |                | Universal   |
| pX330                                                |                                    |              |                                |                   |     | Addgene #42230 |             |
| pX330-sgAxin1.1                                      | sgAxin1.1                          |              | Axin1                          | Loss of function  |     |                | mouse       |

|                                |           |     |                    |                   |                |            |
|--------------------------------|-----------|-----|--------------------|-------------------|----------------|------------|
| pX330-sgAxin1.2                | sgAxin1.2 |     | Axin1              | Loss of function  |                | mouse      |
| pX330-sgAxin1.3                | sgAxin1.3 |     | Axin1              | Loss of function  |                | mouse      |
| pX330-sgAXIN1.1                | sgAXIN1.1 |     | AXIN1              | Loss of function  |                | human      |
| pX330-sgAXIN1.2                | sgAXIN1.2 |     | AXIN1              | Loss of function  |                | human      |
| pX330-sgAXIN1.3                | sgAXIN1.3 |     | AXIN1              | Loss of function  |                | human      |
| pRL-CMV                        |           | CMV | Renilla Luciferase | Induce expression | Promega E2231  |            |
| lentiCRISPRv2                  |           |     | Cas9               |                   | Addgene #98290 | Lentiviral |
| lentiCRISPRv2-<br>sgAxin1      |           |     | Axin1              | Loss of function  |                | Lentiviral |
| shEgfp/pLKO.1                  |           |     | EGFP               | Control           |                |            |
| sh $\beta$ -<br>Catenin/pLKO.1 |           |     | $\beta$ -Catenin   | Loss of function  | Addgene #18803 |            |
| Super 8x TopFlash              |           |     |                    |                   | Addgene #12456 |            |
| Super 8x FopFlash              |           |     |                    |                   | Addgene #12457 |            |

---

**Supplementary Table 2.** Clinicopathological features of HCC Patients

| Variables                                       | Features          |                   |
|-------------------------------------------------|-------------------|-------------------|
|                                                 | HCCB <sup>a</sup> | HCCP <sup>b</sup> |
| No. of patients                                 | 49                | 54                |
| Male                                            | 45                | 48                |
| Female                                          | 4                 | 6                 |
| Age (Mean $\pm$ SD)                             | 55.8 $\pm$ 12.4   | 54.2 $\pm$ 14.5   |
| Etiology                                        |                   |                   |
| HBV                                             | 26                | 25                |
| HCV                                             | 13                | 14                |
| Ethanol                                         | 7                 | 9                 |
| Wilson disease                                  | 2                 | 2                 |
| Hemochromatosis                                 | 0                 | 1                 |
| NA                                              | 1                 | 2                 |
| Cirrhosis                                       |                   |                   |
| +                                               | 40                | 46                |
| -                                               | 9                 | 8                 |
| Tumor size                                      |                   |                   |
| > 5 cm                                          | 24                | 36                |
| < 5 cm                                          | 25                | 18                |
| Edmondson and Steiner grade                     |                   |                   |
| I                                               | 6                 | 4                 |
| II                                              | 15                | 12                |
| III                                             | 14                | 18                |
| IV                                              | 14                | 20                |
| Serum alpha-fetoprotein level (ng/ml)           |                   |                   |
| > 300                                           | 19                | 20                |
| < 300                                           | 28                | 33                |
| NA                                              | 1                 | 1                 |
| Survival after partial liver resection (months) |                   |                   |
| Means $\pm$ SD <sup>c</sup>                     | 66.8 $\pm$ 26.4   | 14.4 $\pm$ 8.7    |
| $\beta$ -Catenin ( <i>CTNNB1</i> ) mutation     |                   |                   |
| Present                                         | 11                | 9                 |
| Absent                                          | 38                | 50                |

|                                          |    |    |
|------------------------------------------|----|----|
| <i>Axin1</i> mutation                    |    |    |
| Present                                  | 2  | 9  |
| Absent                                   | 47 | 50 |
| C-Met expression                         |    |    |
| High                                     | 16 | 21 |
| Low                                      | 33 | 38 |
| <i>CKS2</i> mRNA levels (compared to SL) |    |    |
| High (2 fold higher than SL)             | 14 | 24 |
| Low (equal or lower than SL)             | 35 | 35 |

<sup>a</sup>HCCB, HCC with better prognosis (survival longer than 3 years)

<sup>b</sup>HCCP, HCC with poorer prognosis (survival shorter than 3 years)

<sup>c</sup> $P < 0.0001$

Abbreviations: NA, not available; SL, surrounding non-tumorous tissue.



**Supplementary Table 3.** List of mice used for the experiments

| Directory | Mice breed                         | Plasmid injected                               | Sample size (n) |
|-----------|------------------------------------|------------------------------------------------|-----------------|
| Figure 1  | FVB/N                              | sgAxin1.1(40μg)                                | 10              |
|           |                                    | sgAxin1.2(40μg)                                | 7               |
|           |                                    | sgAxin1.3(40μg)                                | 6               |
|           |                                    | c-Met (20μg)                                   | 10              |
|           |                                    | sgAxin1.1(40μg)+c-Met(20μg)+SB(0.8μg)          | 10              |
|           |                                    | sgAxin1.2(40μg)+c-Met(20μg)+SB(0.8μg)          | 7               |
|           |                                    | sgAxin1.3(40μg)+c-Met(20μg)+SB(0.8μg)          | 6               |
|           |                                    | β-cateninS45Y(20μg)+c-Met(20μg)+SB(1.6μg)      | 4               |
| Figure 2  | FVB/N                              | sgAxin1.2(40μg)+c-Met(20μg)+SB(0.8μg)          | As Figure 1     |
|           |                                    | β-cateninS45Y(20μg)+c-Met(20μg)+SB(1.6μg)      | As Figure 1     |
|           |                                    | ΔN90-β-catenin(20μg)+c-Met(20μg)+SB(1.6μg)     | 4               |
| Figure 3  | FVB/N                              | sgAxin1.2(40μg)+c-Met(20μg)+SB(0.8μg)          | As Figure 1     |
|           |                                    | ΔN90-β-catenin(20μg)+c-Met(20μg)+SB(1.6μg)     | As Figure 2     |
| Figure 4  | <i>Ctnnb1</i> <sup>+/+</sup>       | sgAxin1.2(40μg)+c-Met(20μg)+Cre(60)+SB(3.2μg)  | 10              |
|           | <i>Ctnnb1</i> <sup>flox/flox</sup> | sgAxin1.2(40μg)+c-Met(20μg)+Cre(60)+SB(3.2μg)  | 10              |
| Figure 5  | FVB/N                              | sgAxin1.2(40μg)+c-Met(20μg)+SB(0.8μg)          | As Figure 1     |
| Figure 6  | <i>Notch2</i> <sup>flox/flox</sup> | sgAxin1.2(40μg)+c-Met(20μg)+pCMV(60)+SB(3.2μg) | 6               |
|           |                                    | sgAxin1.2(40μg)+c-Met(20μg)+Cre(60)+SB(3.2μg)  | 9               |

|                  |                                    |                                                      |             |
|------------------|------------------------------------|------------------------------------------------------|-------------|
| Figure 7         | FVB/N                              | sgAxin1.2(40μg)+c-<br>Met(20μg)+pT3(60)+SB(3.2μg)    | 6           |
|                  |                                    | sgAxin1.2(40μg)+c-<br>Met(20μg)+dnRBPJ(60)+SB(3.2μg) | 4           |
| Sup<br>Figure 6  | FVB/N                              | sgAxin1.1(40μg)                                      | As Figure 1 |
|                  |                                    | sgAxin1.2(40μg)                                      | As Figure 1 |
|                  |                                    | sgAxin1.3(40μg)                                      | As Figure 1 |
| Sup<br>Figure 8  | FVB/N                              | sgAxin1.2(40μg)+c-Met(20μg)+SB(0.8μg)                | As Figure 1 |
|                  |                                    | ΔN90-β-catenin(20μg)+c-Met(20μg)+SB(1.6μg)           | As Figure 2 |
| Sup<br>Figure 13 | <i>Ctnnb1</i> <sup>flox/flox</sup> | ΔN90-β-catenin(20μg)+c-Met(20μg)+Cre(60)+<br>SB(4μg) | 5           |
| Sup<br>Figure 14 | <i>Ctnnb1</i> <sup>flox/flox</sup> | sgAxin1.1(40μg)+c-<br>Met(20μg)+pCMV(60)+SB(3.2μg)   | 2           |
|                  |                                    | sgAxin1.1(40μg)+c-<br>Met(20μg)+Cre(60)+SB(3.2μg)    | 3           |
|                  |                                    | sgAxin1.2(40μg)+c-<br>Met(20μg)+pCMV(60)+SB(3.2μg)   | 4           |
|                  |                                    | sgAxin1.2(40μg)+c-<br>Met(20μg)+Cre(60)+SB(3.2μg)    | As Figure 4 |
|                  |                                    |                                                      |             |

**Supplementary Table 4.** List of antibodies used for immunohistochemistry

| Antibody             | Catalogue Number | Company                  | Species | Dilution |
|----------------------|------------------|--------------------------|---------|----------|
| $\beta$ -Catenin     | Bd 610153        | BD Biosciences           | Mouse   | 1:200    |
| Glutamine Synthetase | Bd 610518        | BD Biosciences           | Mouse   | 1:500    |
| V5 TAG               | R96025           | Thermo Fisher scientific | Mouse   | 1:400    |
| Ki-67                | MA5-14520        | Thermo Fisher scientific | Rabbit  | 1:150    |
| SOX9                 | Ab185230         | Abcam                    | Rabbit  | 1:2000   |
| c-Met                | Ab227637         | Abcam                    | Rabbit  | 1:400    |
|                      |                  | BD Transduction          |         |          |
| E-cadherin           | 02660            | Laboratories             | Mouse   | 1:200    |

**Supplementary Table 5.** List of antibodies used for Western blot analysis

| Antibody                    | Catalogue Number | Company                      | Species | Dilution |
|-----------------------------|------------------|------------------------------|---------|----------|
| $\beta$ -Catenin            | Bd 610153        | BD Biosciences               | Mouse   | 1:2000   |
| Glutamine Synthetase        | Bd 610518        | BD Biosciences               | Mouse   | 1:5000   |
| GAPDH                       | AB2302           | EMD Millipore                | Mouse   | 1:10000  |
| $\beta$ -Actin              | A5441            | Sigma-Aldrich                | Mouse   | 1:5000   |
| V5 TAG                      | R96025           | Thermo Fisher<br>scientific  | Mouse   | 1:5000   |
| c-Met                       | 71-8000          | Invitrogen                   | Rabbit  | 1:400    |
| Phospho-Met<br>(Y1234/1235) | 3077             | Cell Signaling<br>Technology | Rabbit  | 1:400    |
| Cyclin D1                   | ab134175         | Abcam                        | Rabbit  | 1:20000  |
| c-Myc                       | ab32072          | Abcam                        | Rabbit  | 1:10000  |
| $\beta$ -Tubulin            | ab6046           | Abcam                        | Rabbit  | 1:10000  |
| Jagged1                     | Ab109536         | Abcam                        | Rabbit  | 1:1000   |
| SOX9                        | Ab185230         | Abcam                        | Rabbit  | 1:5000   |

|                                                       |      |                              |        |        |
|-------------------------------------------------------|------|------------------------------|--------|--------|
| Axin1                                                 | 2087 | Cell Signaling<br>Technology | Rabbit | 1:1000 |
| Phospho- $\beta$ -Catenin<br>(Ser552)                 | 9566 | Cell Signaling<br>Technology | Rabbit | 1:1000 |
| Phospho- $\beta$ -Catenin<br>(Ser675)                 | 9567 | Cell Signaling<br>Technology | Rabbit | 1:1000 |
| Phospho- $\beta$ -Catenin<br>(Ser33/37/Thr41)         | 9561 | Cell Signaling<br>Technology | Rabbit | 1:1000 |
| Phospho- $\beta$ -Catenin<br>(Ser45)                  | 9564 | Cell Signaling<br>Technology | Rabbit | 1:1000 |
| Phospho- $\beta$ -Catenin<br>(Thr41/Ser45)            | 9565 | Cell Signaling<br>Technology | Rabbit | 1:1000 |
| Non-phospho- $\beta$ -<br>Catenin<br>(Ser33/37/Thr41) | 4270 | Cell Signaling<br>Technology | Rabbit | 1:1000 |
| Akt                                                   | 9272 | Cell Signaling               | Rabbit | 1:1000 |

|                                                    |       |                              |        |         |
|----------------------------------------------------|-------|------------------------------|--------|---------|
|                                                    |       | Technology                   |        |         |
| Phospho-Akt (Ser473)                               | 4060  | Cell Signaling<br>Technology | Rabbit | 1:1000  |
| Phospho-Akt (Thr308)                               | 9275  | Cell Signaling<br>Technology | Rabbit | 1:1000  |
| p44/42 MAPK<br>(Erk1/2)                            | 9102  | Cell Signaling<br>Technology | Rabbit | 1:1000  |
| Phospho-p44/42<br>MAPK (Erk1/2)<br>(Thr202/Tyr204) | 4370  | Cell Signaling<br>Technology | Rabbit | 1:1000  |
| Flag Tag                                           | 14793 | Cell Signaling<br>Technology | Rabbit | 1:1000  |
| Notch2                                             | 5732  | Cell Signaling<br>Technology | Rabbit | 1:10000 |
| Histone H3                                         | 4499  | Cell Signaling<br>Technology | Rabbit | 1:2000  |

---

**Supplementary Table 6.** List of primer pairs used in qRT-PCR analysis

| Gene name          | Forward                  | Reverse                 |
|--------------------|--------------------------|-------------------------|
| 18s rRNA           | CGGCTACCACATCCAAGGAA     | GCTGGAATTACCGCGGCT      |
| Mouse-AXIN2        | GCTCCAGAAGATCACAAAGAGC   | AGCTTTGAGCCTTCAGCATC    |
| Mouse-LGR5         | ACCGAGCCTTACAGAGCCT      | GCCGTCGTCTTTATTCCATTGG  |
| Mouse-c-Myc        | TGTACCTCGTCCGATTCC       | CATCTTCTTGCTCTTCTTCAG   |
| Mouse-<br>CyclinD1 | CGTGGCCTCTAAGATGAAGGA    | CCTCGGGCCGGATAGAGTAG    |
| Mouse-GS           | CAGGCTGCCATACCAACTTCA    | TCCTCAATGCACTTCAGACCAT  |
| Mouse-LECT2        | CCCACAACAATCCTCATTTTCAGC | ACACCTGGGTGATGCCTTTG    |
| Mouse-TBX3         | CAGGCAGCCTTCAACTGCTT     | GGACACAGATCTTTGAGGTTGGA |
| Mouse-OAT          | GGAGTCCACACCTCAGTCG      | CCACATCCCACATATAAATGCCT |
| Mouse-AFP          | TCTGCTGGCACGCAAGAAG      | TCGGCAGGTTCTGGAAACTG    |
| Mouse-GPC3         | CAGCCCGGACTCAAATGGG      | CAGCCGTGCTGTTAGTTGGTA   |
| Mouse-Hey1         | GCGCGGACGAGAATGGAAA      | TCAGGTGATCCACAGTCATCTG  |
| Mouse-Axin1        | AGTCCACCATGGAGGAGAAT     | CCATAACTCAACAGCAGCTG    |

**Supplementary Table 7.** List of the cell lines used for the experiments

| Cell lines | Cell line type       | Order Information    | Catalog Number | Culture Condition                                  |
|------------|----------------------|----------------------|----------------|----------------------------------------------------|
| HCC3-4     | Mouse HCC            | Dr. Dean Felsher (1) | N/A            | DMEM+10%FBS+1%Pen/Strep                            |
| HCC4-4     | Mouse HCC            | Dr. Dean Felsher (1) | N/A            | DMEM+10%FBS+1%Pen/Strep                            |
| Hep40      | Human HCC            | Dr. Brian Carr (2)   | N/A            | DMEM+10%FBS+1%Pen/Strep                            |
| HLE        | Human HCC            | JCRB Cell Bank       | JCRB0405       | DMEM+10%FBS+1%Pen/Strep                            |
| HLF        | Human HCC            | JCRB Cell Bank       | JCRB0404       | DMEM+10%FBS+1%Pen/Strep                            |
| MHCC97H    | Human HCC            | Dr. Binbin Liu (3)   | N/A            | DMEM+10%FBS+1%Pen/Strep                            |
| Huh7       | Human HCC            | JCRB Cell Bank       | JCRB0403       | DMEM+10%FBS+1%Pen/Strep                            |
| PLC/PRF/5  | Human HCC            | ATCC                 | CRL-8024       | DMEM+10%FBS+1%Pen/Strep                            |
| SNU-398    | Human HCC            | ATCC                 | CRL-2233       | DMEM+10%FBS+1%Pen/Strep                            |
| SNU-449    | Human HCC            | ATCC                 | CRL-2234       | DMEM+10%FBS+1%Pen/Strep                            |
| SNU-475    | Human HCC            | ATCC                 | CRL-2236       | DMEM+10%FBS+1%Pen/Strep                            |
| SNU-423    | Human HCC            | ATCC                 | CRL-2238       | RPMI 1640+10%FBS+1%Pen/Strep                       |
| SNU-182    | Human HCC            | ATCC                 | CRL-2235       | RPMI 1640+10%FBS+1%Pen/Strep                       |
| HepG2      | Human hepatoblastoma | ATCC                 | HB-8065        | DMEM+10%FBS+1%Pen/Strep                            |
| Hep293TT   | Human hepatoblastoma | Dr. Gail Tomlinson   | N/A            | <b>RPMI 1640+25mM<br/>HEPES+10%FBS+1%Pen/Strep</b> |



(4)

Huh6

Human hepatoblastoma

JCRB Cell Bank

JCRB0401

DMEM+10%FBS+1%Pen/Strep

---

1: PubMed ID: 21262914

2: PubMed ID: 7590653

3: PubMed ID: 10555751

4: PubMed ID: 19637320

## Materials and methods

### Constructs and reagents

The plasmids used for mouse injection are reported in Supplementary Table 1. pT3-EF1 $\alpha$ , pT3-EF1 $\alpha$ -c-Met, pT3-EF1 $\alpha$ - $\beta$ -cateninS45Y, pT3-EF1 $\alpha$ - $\Delta$ 90- $\beta$ -catenin, pT3-EF5 $\alpha$ -dnRBPJ (with N-terminal V5 tag), pT3-EF5 $\alpha$ -dnTCF4(with N-terminal Flag tag), pCMV, pCMV-Cre and pCMV/sleeping beauty transposase (SB) have been described in our previous publications (1-3). dnTCF4, dnRBPJ were cloned into pLenti-puro via the Gateway PCR cloning strategy (Invitrogen, Carlsbad, CA). To delete Axin1 while co-expressing c-Met into the mouse liver and delete Axin1 in human HCC cell line, we constructed pX330 plasmids expressing mouse Cas9 and single-guide RNAs (sgRNAs) against the mouse Axin1(NM\_001159598.1 ). We constructed lentiCRISPRv2 plasmids expressing human or mouse Cas9 and sgRNAs against the mouse Axin1, human Axin1(NM\_003502.3), EGFP(YP\_009062989.1). pX330-U6-Chimeric\_BB-CBh-hSpCas9 (pX330) and lentiCRISPRv2 puro were obtained from Addgene (Addgene plasmid #42230, #98290). pX330 and lentiCRISPRv2-puro were digested with BbsI and BsmBI, respectively, and ligated with annealed oligos. Twenty-nucleotide sequences followed by the PAM sequence were used as seed sequences for sgRNA. An extra G is added for sgRNAs lacking a 5' G for U6 transcriptional initiation (4, 5). For silencing of  $\beta$ -catenin in human HCC cell line, pLKO.1 puro shRNA  $\beta$ -catenin was obtained from Addgene (Addgene plasmid #18803), empty vector pLKO.1 puro as control was also from Addgene (Addgene plasmid #8453). Super 8x TopFlash and Super 8x FopFlash plasmids were obtained from Addgene (plasmid #12456, plasmid #12457), and pRL-CMV Renilla luciferase plasmid was purchased from Promega (Madison, WI). Before use, all the plasmids were purified using the Endotoxin free Maxi prep kit (Sigma-Aldrich, St. Louis, MO).

### Human liver tissue specimens

A collection of frozen HCC samples (n=103) was used in the present study. Tumors were divided in HCC with shorter survival/poorer prognosis (HCCP; n=54) and longer survival/better prognosis

(HCCB; n=49), characterized by <3 and >3 years' survival following partial liver resection, respectively. The clinicopathological features of liver cancer patients are summarized in Supplementary Table 2. HCC specimens were generously provided by Dr. Snorri S. Thorgeirsson (National Institutes of Health, National Cancer Institute, Bethesda, MD). Institutional Review Board approval was obtained at the National Institutes of Health and the local Ethical Committee of the Medical University of Greifswald. Informed consent was obtained from all individuals.

### **Mice and hydrodynamic tail injection**

We obtained wild-type (WT) FVB/N, *Ctnnb1*<sup>+/+</sup>, *Ctnnb1*<sup>fl/fl</sup> and *Notch2*<sup>fl/fl</sup> mice from The Jackson Laboratory (Sacramento, CA). To establish the sgAxin1/c-Met-induced HCC model, we performed hydrodynamic injection of plasmid DNAs into the tail vein of 6- to 8-week-old mice following a published protocol (6). Sleeping beauty(SB) transposase hydrodynamic tail vein injection was performed as described (6). For the tumorigenesis models, mice received 40µg pX330-Axin1.1 or pX330-Axin1.2 or pX330-Axin1.3 mixed with 20µg pT3-EF1α-c-Met (human) along with 0.8µg pCVM/SB in 2ml of normal saline (0.9%NaCl). To determine whether or not sgAxin1/c-Met induced HCC development depended on intact β-catenin signaling and Notch2 cascade in mice, *Ctnnb1*<sup>fl/fl</sup> mice and *Ctnnb1*<sup>+/+</sup> mice were injected with 40µg pX330-Axin1.2, 20µg pT3-EF1α-c-Met, 60µg pCMV-Cre together with pCMV-SB (3.2 µg). *Notch2*<sup>fl/fl</sup> mice were given same dose of plasmid as mentioned above, while 60µg pCMV as vector control was delivered into mice. For FVB/N mice, we injected 40µg pX330-Axin1.2, 20µg pT3-EF1α-c-Met, 60µg dominant negative TCF4(dnTCF4)-pT3-EF5α or 60µg dominant negative RBPJ(dnRBPJ)-pT3-EF5α, pT3-EF1α as vector control together with pCMV-SB (3.2 µg). The solution was filtered through 0.22µm filter (EMD Millipore, Burlington, MA). Mice were housed, fed, and monitored in accord with protocols approved by the Committee for Animal Research at the University of

California San Francisco (San Francisco, CA). All mice were monitored for signs of morbidity or discomfort. Pay close attention to the abdominal girth. Mice were sacrificed at indicated time points or when they became moribund. The body weight, liver weight and liver tumor size were measured for each mouse. A complete list of the mice used in this study is provided in Supplementary Table 3.

### **Hematoxylin-Eosin (H&E) staining and Immunohistochemistry (IHC)**

Mouse and human liver tissues were fixed in 4% paraformaldehyde overnight at 4°C, then processed and embedded in paraffin. Tissue sections of 5 µm thickness were cut from paraffin blocks and used for Hematoxylin & Eosin (H&E) staining and immunohistochemistry. H&E staining was performed to determine the time of appearance and characteristics of neoplastic foci. For immunohistochemistry, the slides were put through de-paraffinization, antigen retrieval was performed in 10mM sodium citrate buffer (pH 6.0) by placement in a microwave oven on high for 10 min, then cooling down for 20 minutes at room temperature. After a blocking step with the 5% goat serum and Avidin-Biotin blocking kit (Vector Laboratories Inc., Burlingame, CA), the sections were incubated with the primary antibodies (see Supplementary Table 4) overnight at 4°C. Slides were then subjected to 3% hydrogen peroxide for 10 min to quench endogenous peroxidase activity and subsequently the secondary antibody was applied at a 1:500 dilution for 30 min at room temperature. Signal was detected using the Vectastain ABC Elite kit (Vector Laboratories Inc.) and developed using DAB (Vector Laboratories, Inc.). Sections were counterstained with hematoxylin solution (ThermoFisher Scientific, Pittsburgh, PA) and passed through the dehydration process and covered-slipped.

### **Protein isolation and Western blot analysis**

Liver tissue were homogenized with a Polytron and cells were washed in PBS and lysed in M-PER™ Mammalian Protein Extraction Reagent (ThermoFisher Scientific) containing the Halt™

Protease Inhibitor Cocktail (ThermoFisher Scientific). Protein concentration was quantified using the Pierce™ Microplate BCA Protein Assay Kit (ThermoFisher Scientific). Membranes were blocked with 5% (w/v) non-fat milk in Tris-buffered saline containing 0.05% Tween-20 at room temperature for 1 hour and then incubated with the primary antibodies (see Supplementary Table 5) at 4°C overnight, followed by incubation with horseradish peroxidase-conjugated goat anti-rabbit or goat anti-mouse secondary antibody (1:5000; Jackson ImmunoResearch Laboratories Inc., West Grove, PA) for 1 hour at room temperature. After appropriate washing, membranes were developed with the Super Signal West Dura Kit (ThermoFisher Scientific). Experiments were replicated three times.

### **Quantitative real-time reverse-transcription polymerase chain reaction**

Total RNAs were extracted from frozen mouse tissue samples using the Quick-RNA™ MiniPrep (Zymo Research, Irvine, CA), The preparation of cDNA was carried out prior to real-time PCR (q-PCR) by reverse transcription of purified RNA according to the manufacturer's instructions (Invitrogen, Carlsbad, CA). The primers used for PCR analysis were synthesized by Integrated DNA Technologies (Coralville, IA). The sequences of the primers are listed on Supplementary Table 6. Amplification was done with 100 ng of cDNA using an ABI Prism 7000 Sequence Detection System and TaqMan Universal PCR Master Mix (ThermoFisher Scientific). Cycling conditions were: 10 min of denaturation at 95°C, and 40 cycles at 95°C for 15 s and at 52°C for 1 min. Quantitative values were calculated by using the PE Biosystems Analysis software and expressed as N target (NT).  $NT = 2^{-\Delta Ct}$ , the  $\Delta Ct$  value of each sample was calculated by subtracting the maximum Ct value of the target gene from the average Ct value of the rRNA gene. To analyze *CKS2* expression in human HCC samples, Gene Expression Assays for human *CKS2* (ID # Hs00829071\_s1) and  $\beta$ -Actin (ID # 4333762T) genes were purchased from Applied Biosystems (Foster City, CA, USA). Quantitative values were calculated by using the PE Biosystems Analysis software and expressed as Number target (NT).  $NT = 2^{-\Delta Ct}$ , wherein  $\Delta Ct$

value of each sample was calculated by subtracting the average Ct value of the *CKS2* gene from the average Ct value of the *β-Actin* gene.

### **Mouse and human tumor genomic DNA extraction and sequencing**

Mouse genomic DNA was extracted from frozen mouse tissue samples using the Mouse Direct PCR Kit, according to the manufacturer's instructions (Biotools, Jupiter, FL). The primers used for PCR amplification were synthesized by Integrated DNA Technologies (Coralville, IA). The sequences of the primers are listed in Supplementary Table 6. Amplification was carried out using Gene Amp PCR System 2700. Cycling conditions were: 5 min of denaturation at 94°C and 35 cycles at 94°C for 20 s, at 49°C for 30s, and at 72°C for 30s. PCR products were purified and sequenced. For individual clonal sequencing, we inserted the purified PCR amplification product to the pJET1.2/blunt cloning vector according to the manufacturer's instructions (ThermoFisher Scientific). Individual clones were cultured and plasmids were purified using Zyppy Plasmid Miniprep kit (Genesee Scientific). The inserted sequence was subsequently sequenced using T7 primers.

Human DNA was extracted from frozen human liver tissues using the DNeasy Blood & Tissue Kit (Qiagen Inc., Germantown, MD) following the manufacturer's instructions. PCR amplifications were performed using genomic DNA from 103 human HCC samples using a previously described set of primers for *CTNNB1* and *AXIN1* genes(7). PCR products were electrophoresed, excised, and purified from 2% TAE-agarose gel using the QIAEX II gel extraction kit (Qiagen, Inc.), and sequenced following a previously established protocol (7).

### ***In situ* hybridization**

*In situ* hybridization was performed as described (8), using RNAscope 2-plex Detection Kit according to the manufacturer's instructions (Advanced Cell Diagnostics, Newark, CA).

### **Cell lines and culture**

Two mouse HCC cell lines (HCC3-4 and HCC4-4), 10 human HCC cell lines (SNU-398, SNU-423, SNU-182, SNU-475, SNU-449, PLC/PRF/5, HLE, HLF, Huh7, and MHCC-97H), and 3 human hepatoblastoma cell lines (HepG2, Hep293TT, and Huh6) were used in the study. The HCC3-4 and HCC4-4 cell lines were kindly provided by Dr. Felsher of Stanford University. Hep293TT cell line was provided to us by Dr. Gail Tomlinson from the University of Texas Southwestern Medical Center. SNU-398, SNU-423, SNU-182, SNU-475, SNU-449, HepG2, and PLC HCC cells were obtained from ATCC (Manassas, VA). HLE, HLF, Huh7, and Huh6 cells were obtained from JCRB Cell Bank (Osaka, Japan). MHCC-97H cells are a gift from Dr Binbin Liu. All cell line information is included in Supplementary Table 7. HCC3-4, HCC4-4, HLE, HLF, Huh7, Huh6, MHCC-97, HepG2, and PLC HCC cell lines were cultured in Dulbecco's modified Eagle medium (DMEM) supplemented with 10% FBS, penicillin (100 U/mL), and streptomycin (100 µg/mL). SNU-475, SNU-449, SNU-182, SNU-423, and SNU-398 HCC cells were instead cultured in Roswell Park Memorial Institute 1640 (RPMI 1640) medium supplemented with 10% FBS, penicillin (100 U/mL) and streptomycin (100 µg/mL). Hep293TT cell lines were cultured in RPMI 1640 medium, 25mM HEPES, 10% FBS, penicillin (100 U/mL) and streptomycin (100 µg/mL). All cell lines were cultured at 37°C in a humidified 5% CO<sub>2</sub> incubator and underwent validation before being used in the experiments (Genetica DNA Laboratories, Burlington, NC).

### **Lentiviral transduction**

HEK293T cells were obtained from the American Type Culture Collection (Manassas, VA, USA) and were seeded into 6-wells. When cells reached 50% confluence, 2µg objective plasmid and 2µg lentivirus mix were co-transfected into HEK293T cells by 8ul Lipofectamine 2000 reagents (Invitrogen) with 500µl Opti-MEM medium. After 24h, the medium was replaced with fresh

DMEM containing 30% fetal bovine serum. After incubation for additional 24-48 hour at 37°C, the viral supernatant was harvested and filtered through a 0.45- $\mu$ m filter (Millipore, Bedford, MA, USA), and then HCC3-4, HCC4-4, HLE, and HLF cells were infected with lentivirus plasmid at the volume ratio 1:1. Seventy-two hours post-infection, cells were treated with different concentrations of puromycin (2 $\mu$ g/ml for HCC3-4, HCC4-4, HLE, SNU-475 and 5 $\mu$ g/ml for HLF, SNU-449, and 30 $\mu$ g/ml SNU-182) to select cells containing sgAixn1(mouse)-pLentiCRISPRv.2, sgAxin1(human)-pLentiCRISPRv.2, pLKO.1-sh- $\beta$ -catenin, and pLenti-dnTCF4. Above cells infected with the empty sgEGFP-pLentiCRISPRv.2 or pLKO.1 or pLenti-EGFP vector were used as control.

### **Colony formation assay**

For colony forming assay, SNU-475, SNU-449, SNU-182, and PLC/PRF/5 cells transfected with corresponding lentivirus were plated in 6-well culture plates at a density of  $1 \times 10^3$  and  $0.5 \times 10^3$  cells per well, respectively, in triplicate. Two weeks later, colonies were stained with crystal violet and then counted for quantification.

### **Dual-Luciferase Reporter Assay**

HCC3-4, HCC4-4, HLE, HLF, Huh6, Hep293TT, SNU-449, SNU-182, SNU-423, SNU-475, PLC/PRF/5 cells were plated in triplicate in 24-well plate at 70-80% confluency. Cells were transfected using the Lipofectamine 2000 reagents (Invitrogen). In brief, both HCC3-4 and HCC4-4 were transfected with 600ng of pT3-EF1 $\alpha$  (empty vector control) or pT3-EF1 $\alpha$ - $\beta$ -cateninS45Y together with 200ng of TOPFlash plasmid DNA or the negative control FOPFlash, as well as 8ng of pRL-CMV. Each of sgAxin1(mouse)-HCC3-4, sgEGFP-HCC3-4, sgAxin1(mouse)-HCC4-4, sgEGFP-HCC4-4, sgAxin1(human)-HLE, sgEGFP-HLE, sgAxin1(human)-HLF, sgEGFP-HLF and Huh6, Hep293TT, SNU-449, SNU-182, SNU-423,



SNU-475, and PLC cells were transfected with 400ng of TOPFlash plasmid DNA or the negative control FOPFlash, as well as 16ng of pRL-CMV. Cells were harvested 48 hours post transfection. Luciferase activity was measured using the Dual-Luciferase® Reporter Assay System (Promega), according to the manufacturer's protocol. Experiments were repeated at least three times in triplicate.

### **RNAseq experiment**

Total RNA was extracted from normal and liver tumor tissues using the Quick RNA Mini-Prep Kit (Genesee Scientific, El Cajon, CA). Total RNA was submitted to Novogene (Beijing, China). RNA quantification, library preparation, and sequencing were performed by Novogene. The count data are available as Supplementary Data 1.

### **RNAseq analysis**

All analyses were performed in R. Experimental design had 3 groups: "Bcat"(β-Catenin Activation mutation), "sgAxin"(Axin1 deletion), "WT"(Wild-Type) and each group had 4 samples. Gene read counts were in Ensembl Gene ID and converted to Entrez Gene ID. Corresponding Symbol annotations and full gene names were added using the "org.Mm.eg.db" library. NA (Not Annotated), duplicate Entrez IDs and genes without symbols were removed. Only the genes having CPM values above 0.5 in at least two libraries were kept. Normalization by TMM (Trimmed mean of M values) was performed by using *calcNormFactors* function to eliminate composition biases between libraries. Three comparison analyses were conducted between Bcat vs WT, sgAxin vs WT and sgAxin vs Bcat. For identifying differentially expressed genes, R package "edgeR" and *glmTreat* function were used in all three comparisons. Differentially expressed genes were limited by a *p* value of 0.05 and FDR (False Discovery Rate) of 0.05. Genes were mapped to Gene Ontologies using GO.db package, *goana* function which is based on Gene Ontology Consortium. Analysis of GO:0016055 (Wnt Signaling Pathway), GO:0007219 (Notch

Signaling Pathway) and GO:0035329 (Hippo Signaling Pathway) was conducted for each comparison using the *FRY* gene set test. The Fry gene set test is a fast approximation to Roast gene set test proposed by Wu *et al* (9), which performs self-contained gene set test (10). It tests whether any of the genes in the set are differentially expressed and can be used for any expression data which could be represented by a linear model. Total numbers of genes involved, Number of up-regulated genes, Number of down-regulated genes, P value, and Direction of Regulation were obtained for each Gene Ontology analysis. List of differentially expressed genes for each Gene Ontology was created for all the comparisons by  $p$  value of 0.05 and FDR of 0.05. Genes were mapped to KEGG Pathways using GO.db package, *kegga* function which obtains the KEGG annotations from <http://rest.kegg.jp> website.

### Human Data HCC TCGA Retrieval and Analysis

To investigate the relationship with c-MET activation and *AXIN1* or *CTNNB1* mutation status in human HCC samples, TCGA data set were retrieved based on frozen on 2/25/2015. The overall sample size is 430, including 59 surrounding non-tumor liver tissues (ST) from both TCGA-LIHC and TCGA-CHOL database and 371 primary HCCs from LIHC database. *AXIN1* and *CTNNB1* mutation information was extracted. Among the 371 HCCs, 24 harbor *AXIN1* mutations and 96 possess *CTNNB1* mutations. RNA sequencing data were also extracted and analyzed in R. EdgeR package (11) was employed to read gene counts. Data were normalized using *calcNormFactors* function to eliminate composition biases between libraries. Gene symbol annotations and full gene names were added using the “org.Hs.eg.db” library (12). For c-MET activation status, we extracted genes from the “KAPOSI\_LIVER\_CANCER\_MET\_UP” gene set, which contains 18 genes which were upregulated in liver cancer samples in response to c-MET activation. *FRY* gene set test was applied to investigate the enrichment of the c-MET\_UP genes in HCC samples. Mann-Whitney test was used for comparison of different gene expression between the ST and *AXIN1* mutated groups. And Fisher’s exact test was employed to compare

the difference in composition of samples with c-MET up signature in ST, *AXIN1* mutated and *CTNNB1* mutated groups. Heatmap was generated using Complex heatmap package (13) in R. We standardized the data with mean as 0 and standard deviation (SD) as 1 and ordered by ascending Average of 18-gene expression of each sample from left to right. As the weight of each gene is 1 in this gene set, samples with Averages more than the Average plus 1.5-fold SD of the ST group was considered as HCC with “c-MET activation”. Tissue types and mutation information was also included in the heatmap.

### Statistical analysis

The Prism 7.0 software (GraphPad, San Diego, CA) was used to analyze the data. Statistical analysis was performed using Student's t-test and Tukey-Kramer test. The data were expressed as the mean $\pm$ SD of at least three independent experiments.  $P < 0.05$  was considered significant.

### References:

1. Lee SA, Ho C, Roy R, Kosinski C, Patil MA, Tward AD, Fridlyand J, et al. Integration of genomic analysis and in vivo transfection to identify sprouty 2 as a candidate tumor suppressor in liver cancer. *Hepatology* 2008;47:1200-1210.
2. Tao J, Xu E, Zhao Y, Singh S, Li X, Couchy G, Chen X, et al. Modeling a human hepatocellular carcinoma subset in mice through coexpression of met and point-mutant beta-catenin. *Hepatology* 2016;64:1587-1605.
3. Wang J, Dong M, Xu Z, Song X, Zhang S, Qiao Y, Che L, et al. Notch2 controls hepatocyte-derived cholangiocarcinoma formation in mice. *Oncogene* 2018.
4. Sanjana NE, Shalem O, Zhang F. Improved vectors and genome-wide libraries for CRISPR screening. *Nat Methods* 2014;11:783-784.
5. Hsu PD, Scott DA, Weinstein JA, Ran FA, Konermann S, Agarwala V, Li Y, et al. DNA targeting specificity of RNA-guided Cas9 nucleases. *Nat Biotechnol* 2013;31:827-832.
6. Chen X, Calvisi DF. Hydrodynamic transfection for generation of novel mouse models for liver cancer research. *Am J Pathol* 2014;184:912-923.
7. Taniguchi K, Roberts LR, Aderca IN, Dong X, Qian C, Murphy LM, Nagorney DM, et al. Mutational spectrum of beta-catenin, AXIN1, and AXIN2 in hepatocellular carcinomas and hepatoblastomas. *Oncogene* 2002;21:4863-4871.
8. Wang B, Zhao L, Fish M, Logan CY, Nusse R. Self-renewing diploid Axin2(+) cells fuel homeostatic renewal of the liver. *Nature* 2015;524:180-185.
9. Wu D, Lim E, Vaillant F, Asselin-Labat ML, Visvader JE, Smyth GK. ROAST: rotation gene set tests for complex microarray experiments. *Bioinformatics* 2010;26:2176-2182.
10. Goeman JJ, Buhlmann P. Analyzing gene expression data in terms of gene sets: methodological issues. *Bioinformatics* 2007;23:980-987.

11. Robinson MD, McCarthy DJ, Smyth GK. edgeR: a Bioconductor package for differential expression analysis of digital gene expression data. *Bioinformatics* 2010;26:139-140.
12. Carlson M. org.Hs.eg.db: Genome wide annotation for Human. In; 2018.
13. Gu Z, Eils R, Schlesner M. Complex heatmaps reveal patterns and correlations in multidimensional genomic data. *Bioinformatics* 2016;32:2847-2849.
